# Supplementary material for: Naphthalene-tagged highly stable and reusable luminescent metal–organic probes for selective and fast detection of 4-nitroaniline in water
Source: Royal Society of Chemistry journal article supplement (doi:10.1039/d2nj00251e), 2022-01-01
Supplement: d2nj00251e1.pdf [file d2nj00251e1.pdf]

## **Electronic Supplementary Information**

### **Naphthalene-tagged highly stable and reusable luminescent metal-organic probes for selective and fast detection of 4-nitroaniline in water**

Alokananda Chanda and Sanjay K. Mandal\*

Department of Chemical Sciences, Indian Institute of Science Education and Research Mohali,  
Sector 81, Manauli PO, S.A.S. Nagar, Mohali, Punjab 140306, India

\*sanjaymandal@iisermohali.ac.in

## Table of Contents

| Section  | Item                                                                                         | Page No. |
|----------|----------------------------------------------------------------------------------------------|----------|
| S-1      | Spectroscopic characterization of <b>1-4</b> (Fig. S1–S4)                                    | S2-S3    |
| S-2      | Study of surface morphology of <b>1-4</b> (Fig. S5–S8)                                       | S4-S7    |
| S-3      | Spectroscopic details for the sensing of different amines by <b>1-4</b> (Fig. S9–S41)        | S8-S22   |
| S-4      | Stern-Volmer plots of 4-NA in presence of <b>1-4</b> (Fig. S42–S45)                          | S23-S24  |
| S-5      | Detection limit calculations for <b>1-4</b> (Fig. S46–S49)                                   | S25-S28  |
| S-6      | Photoluminescence study of H <sub>2</sub> (mbhna) (Fig. S50–S53)                             | S29-S31  |
| S-7      | Spectral overlap (Fig. S54) and possible interaction sites in <b>1-4</b> with 4-NA (Fig. 55) | S32      |
| S-8      | Stability of <b>1-4</b> in 4-NA (Fig. S56-S57)                                               | S33-S34  |
| Table S1 | Literature survey for the detection of 4-NA                                                  | S35      |

Section S-1: Spectroscopic characterization of 1- 4

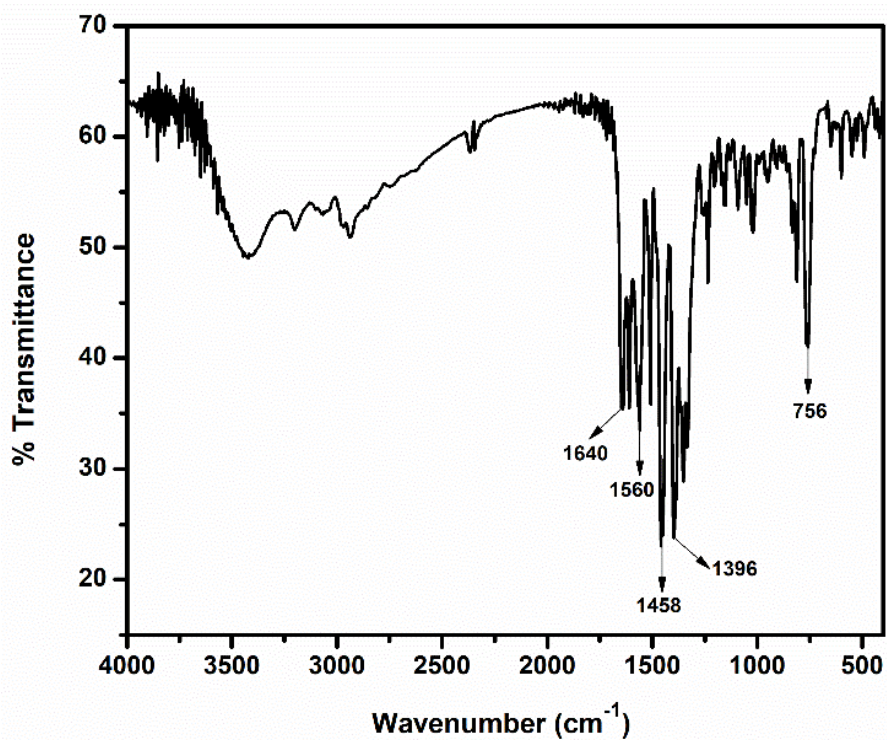

Fig. S1 FTIR spectrum of 1.

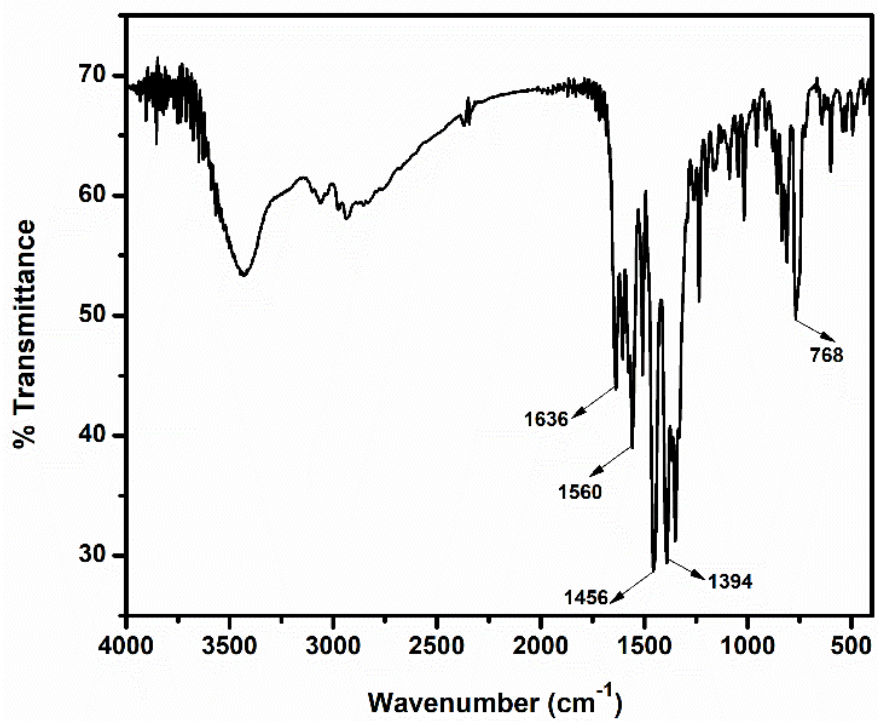

Fig. S2 FTIR spectrum of 2.

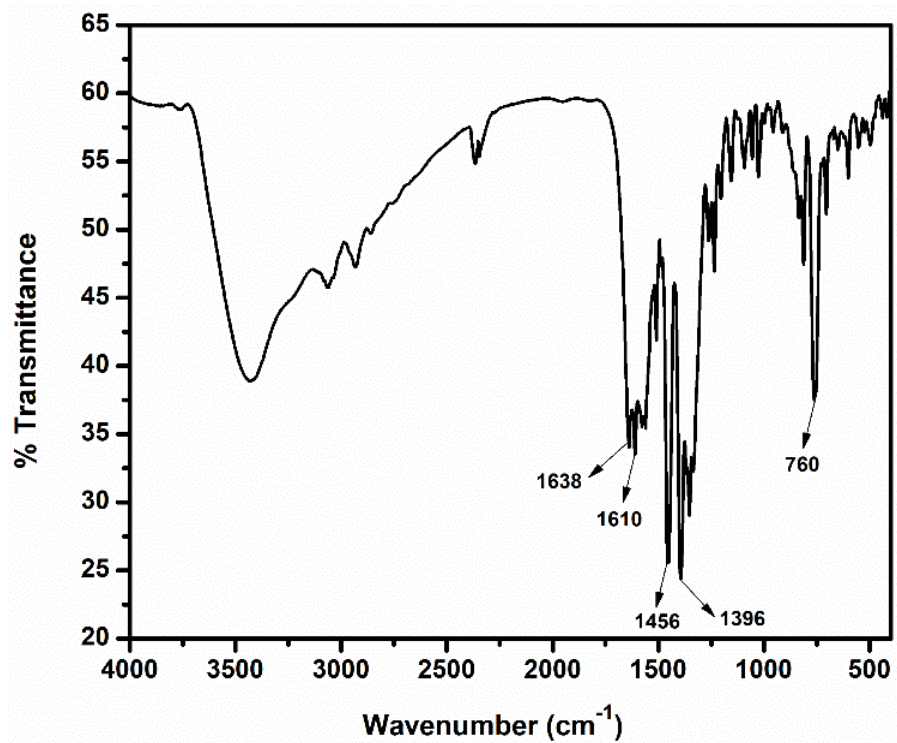

Fig. S3 FTIR spectrum of 3.

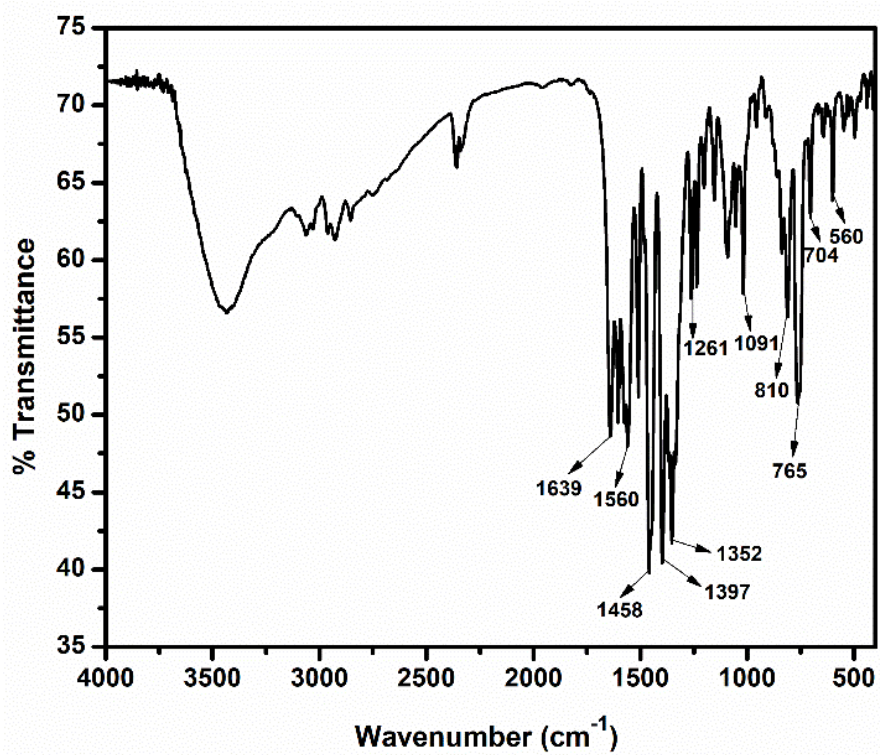

Fig. S4 FTIR spectrum of 4.

Section S-2: Study of surface morphology of 1-4

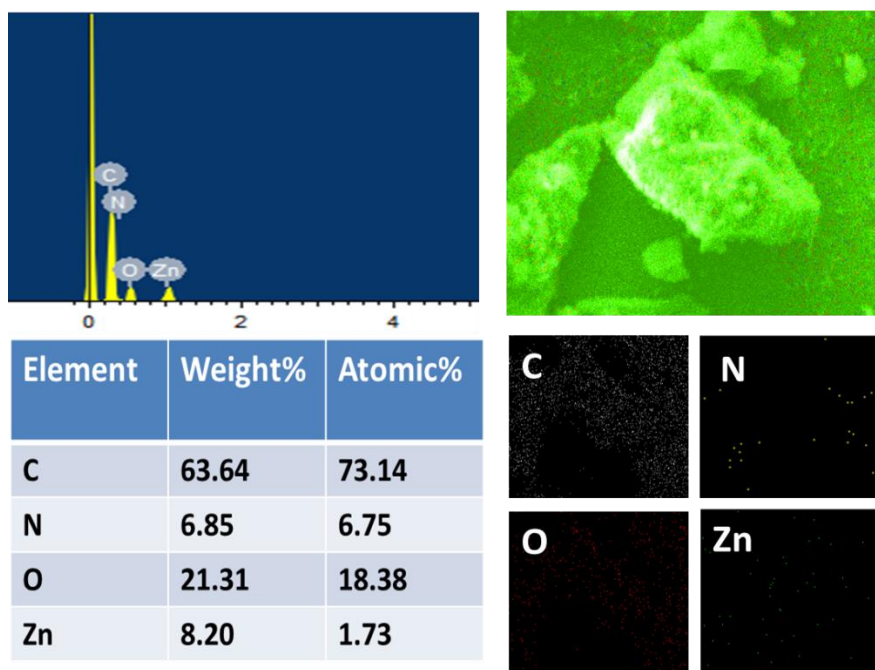

Fig. S5 EDX and elemental mapping of 1.

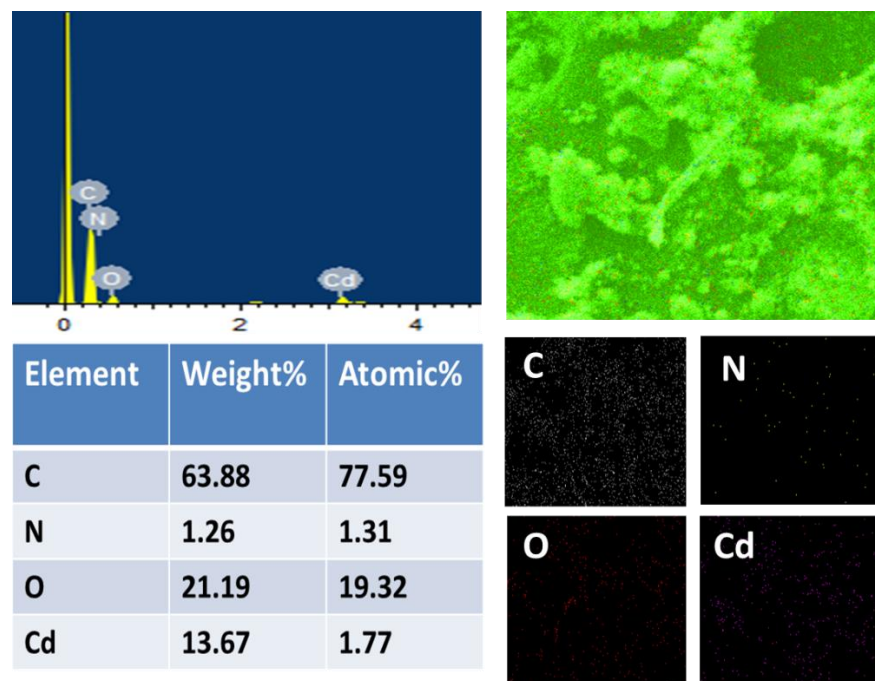

Fig. S6 EDX and elemental mapping of 2.

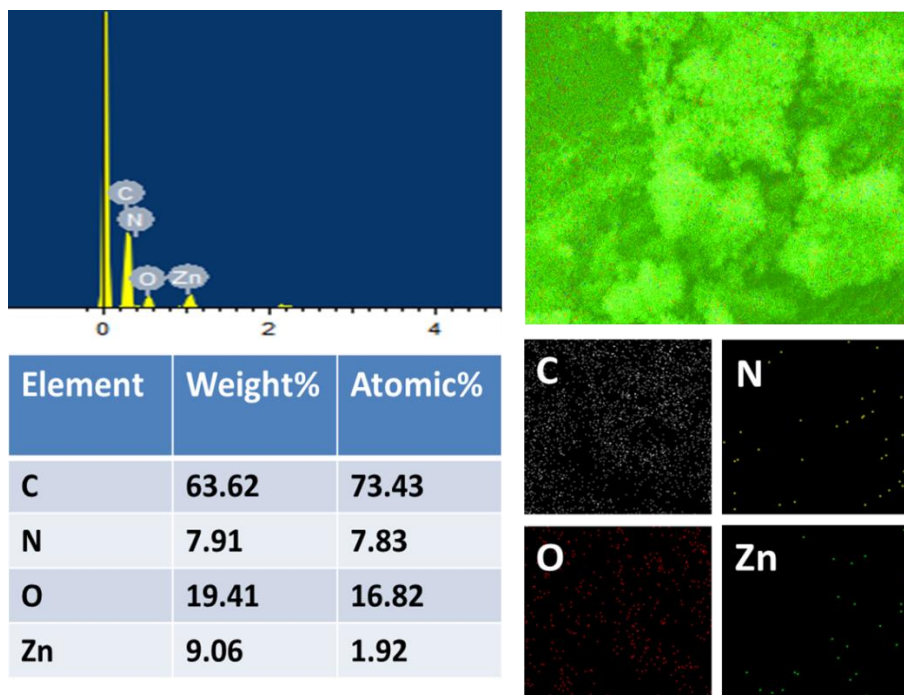

**Fig. S7** EDX and elemental mapping of **3**.

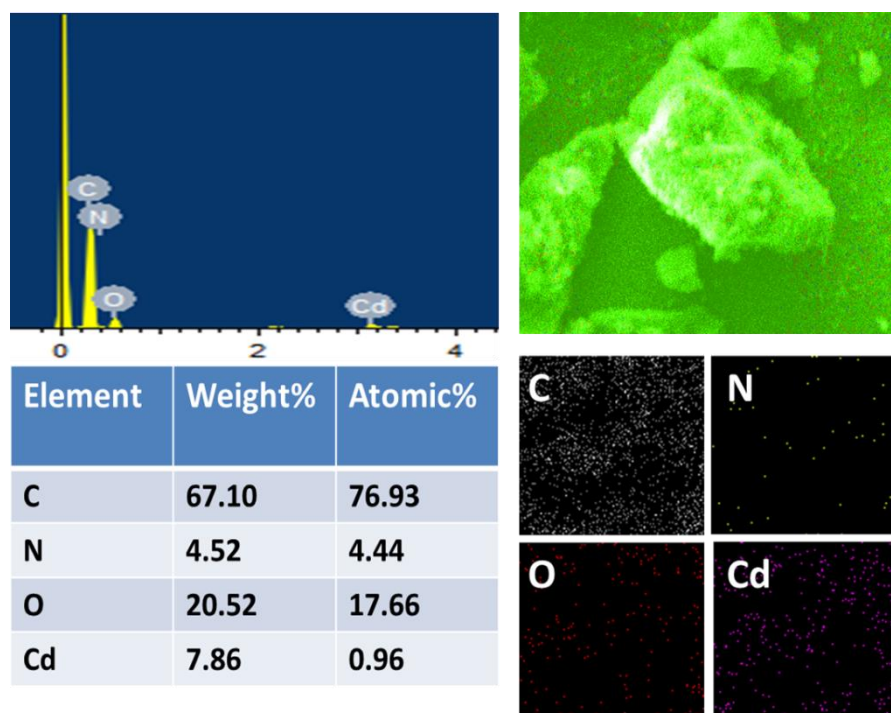

**Fig. S8** EDX and elemental mapping of **4**.

Section S-3: Spectroscopic details for the sensing of different amines by 1-4

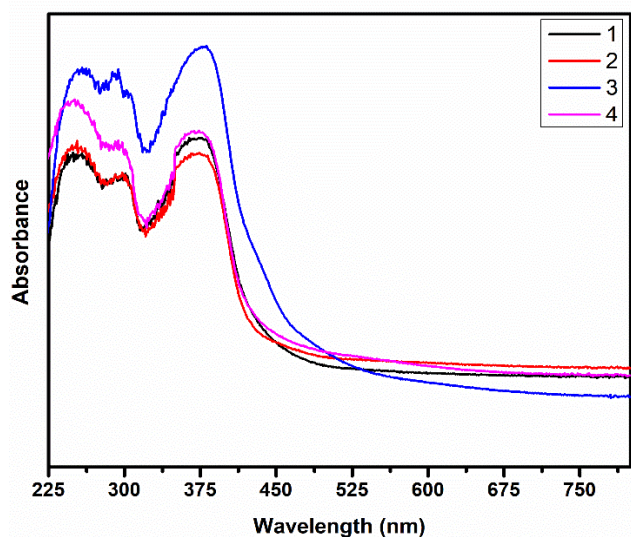

Fig. S9 Solid-state diffuse reflectance spectra of 1-4.

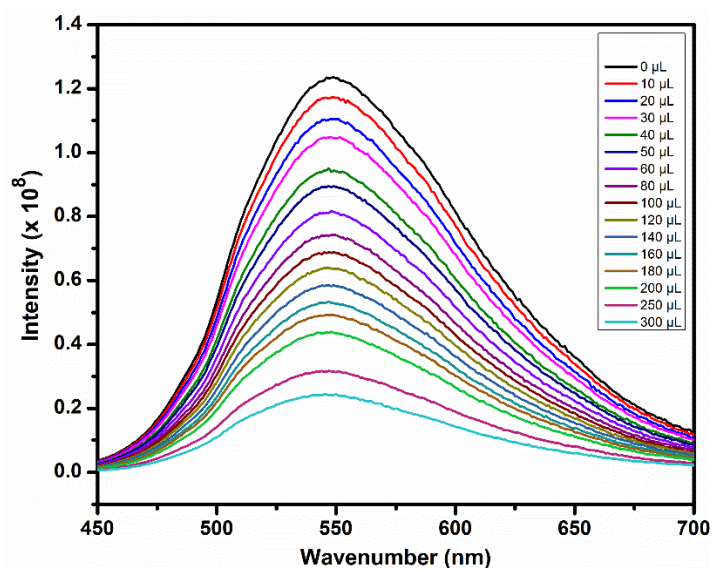

Fig. S10 Emission spectra of 1 dispersed in aqueous solution upon incremental addition of 4-NA solution (1 mM).

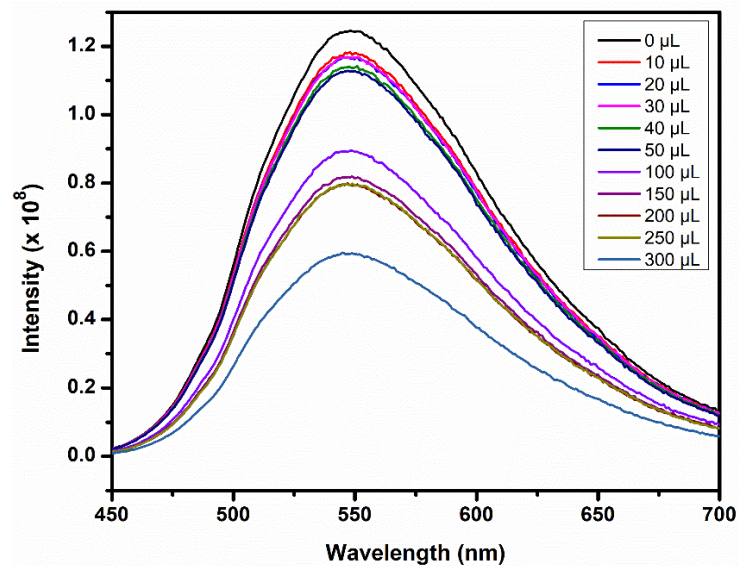

**Fig. S11** Emission spectra of **1** dispersed in aqueous solution upon incremental addition of 2,6-DCNA solution (1 mM).

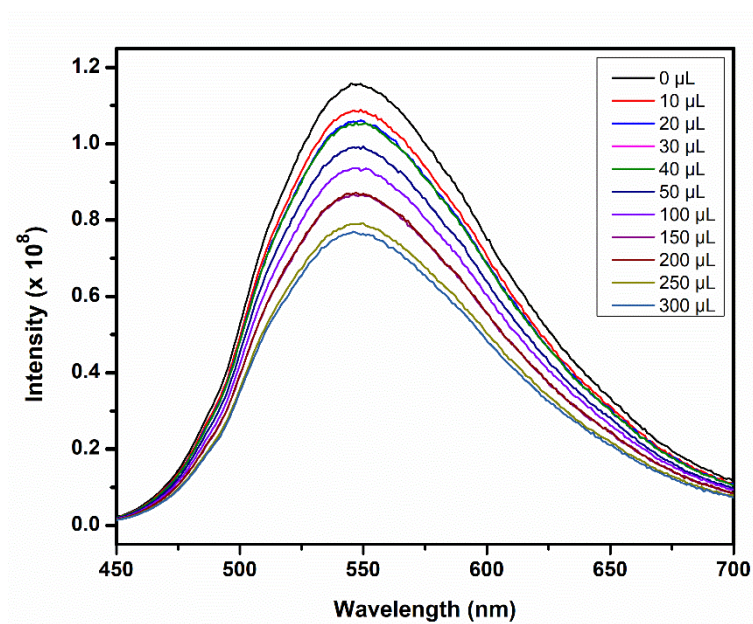

**Fig. S12** Emission spectra of **1** dispersed in aqueous solution upon incremental addition of 2,4-DNA solution (1 mM).



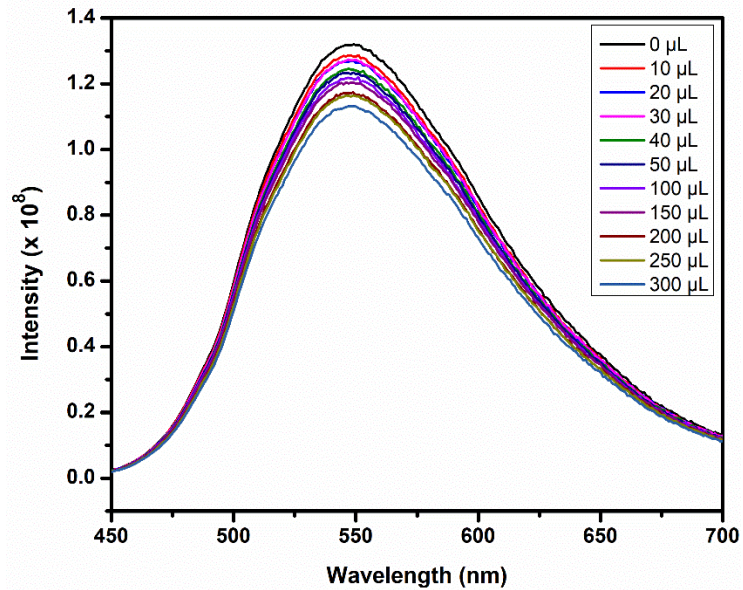

**Fig. S13** Emission spectra of **1** dispersed in aqueous solution upon incremental addition of 3-NA solution (1 mM).

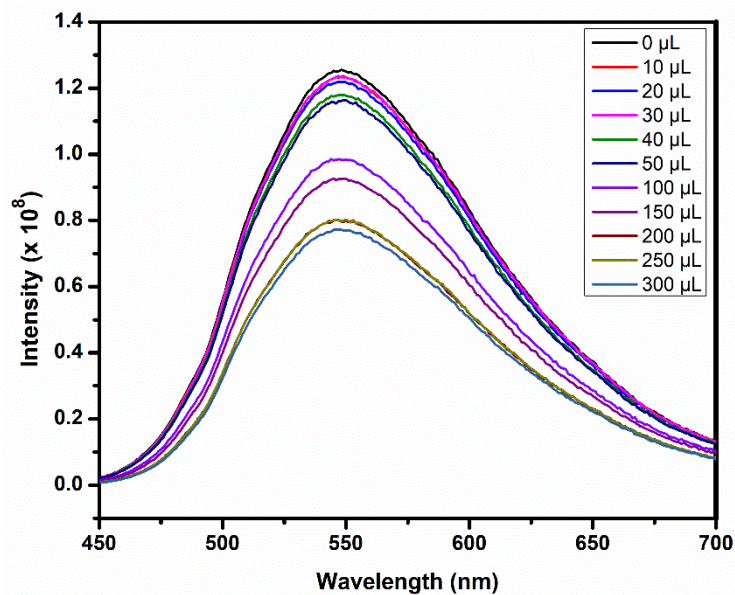

**Fig. S14** Emission spectra of **1** dispersed in aqueous solution upon incremental addition of 2-NA solution (1 mM).

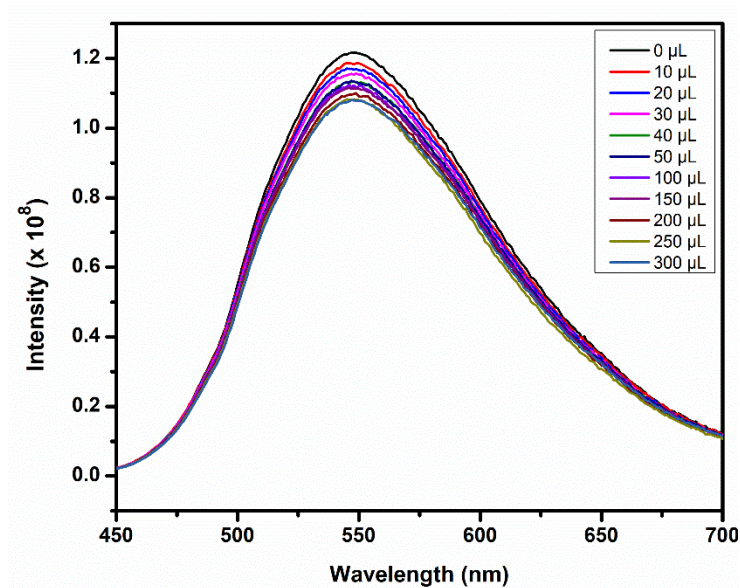

**Fig. S15** Emission spectra of **1** dispersed in aqueous solution upon incremental addition of Aniline solution (1 mM).

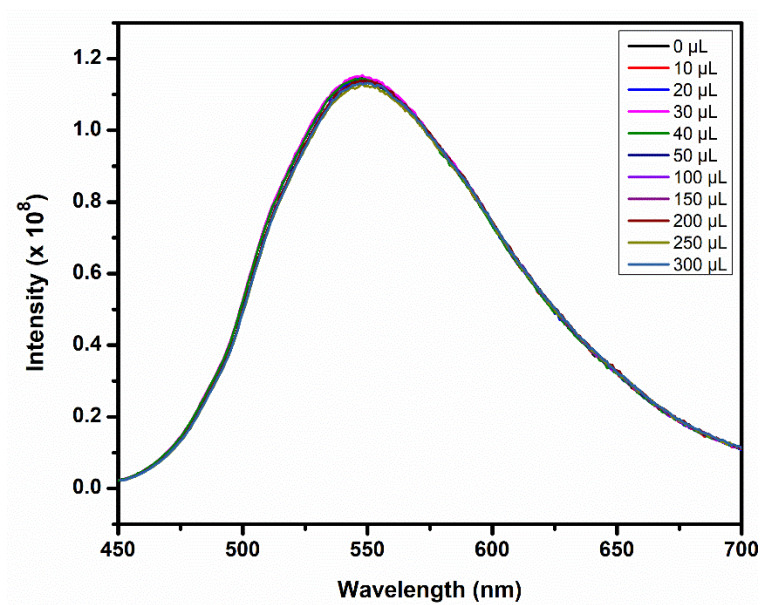

**Fig. S16** Emission spectra of **1** dispersed in aqueous solution upon incremental addition of EDA solution (1 mM).

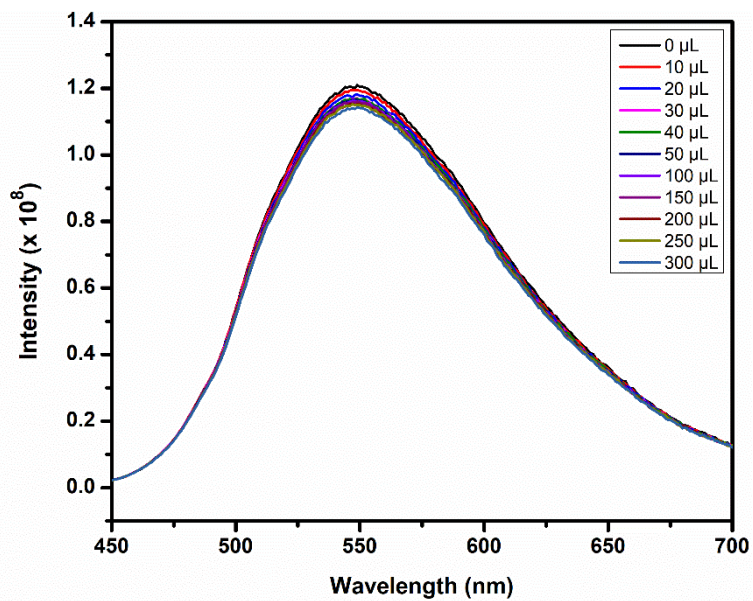

**Fig. S17** Emission spectra of **1** dispersed in aqueous solution upon incremental addition of TEA solution (1 mM).

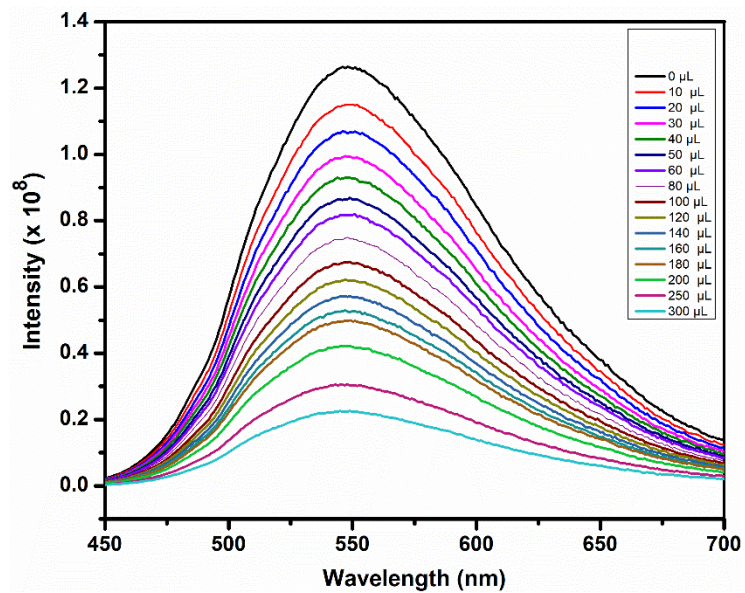

**Fig. S18** Emission spectra of **2** dispersed in aqueous solution upon incremental addition of 4-NA solution (1 mM).

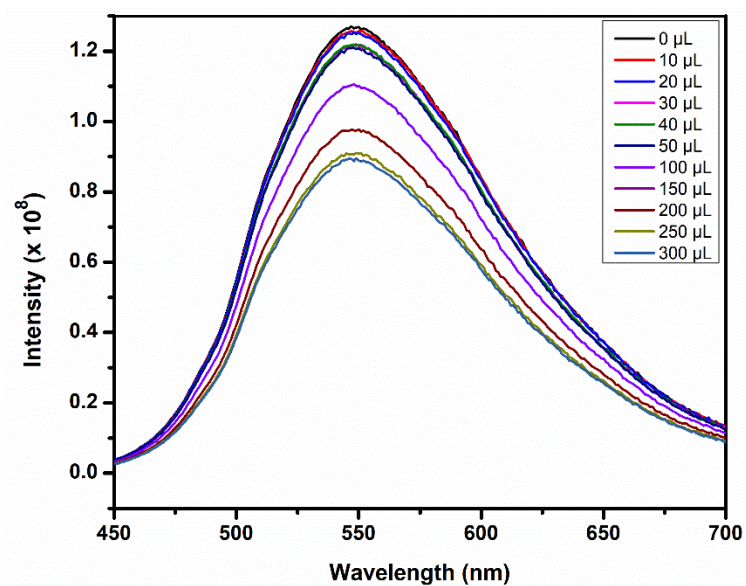

**Fig. S19** Emission spectra of **2** dispersed in aqueous solution upon incremental addition of 2,6-DCNA solution (1 mM).

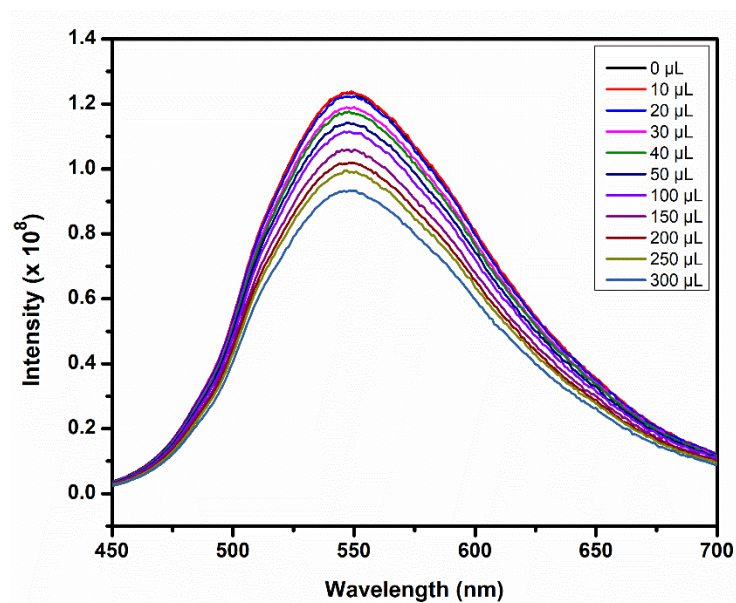

**Fig. S20** Emission spectra of **2** dispersed in aqueous solution upon incremental addition of 2,4-DNA solution (1 mM).

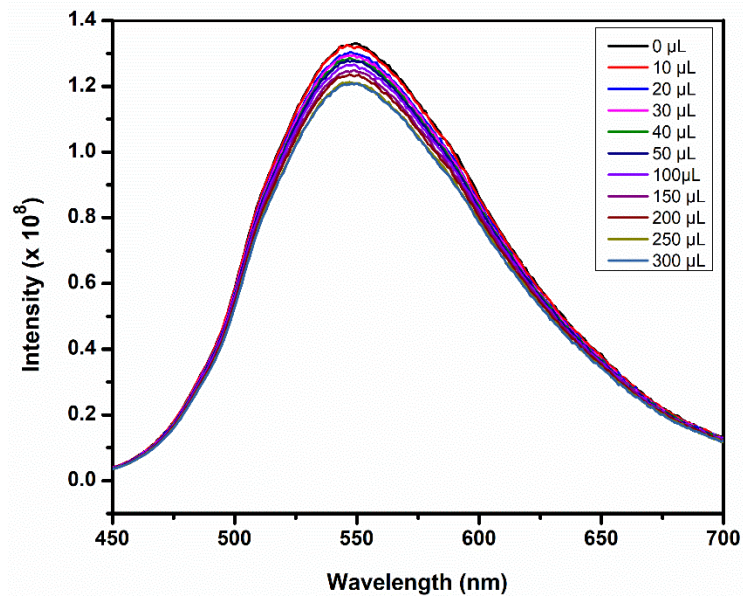

**Fig. S21** Emission spectra of **2** dispersed in aqueous solution upon incremental addition of 3-NA solution (1 mM).

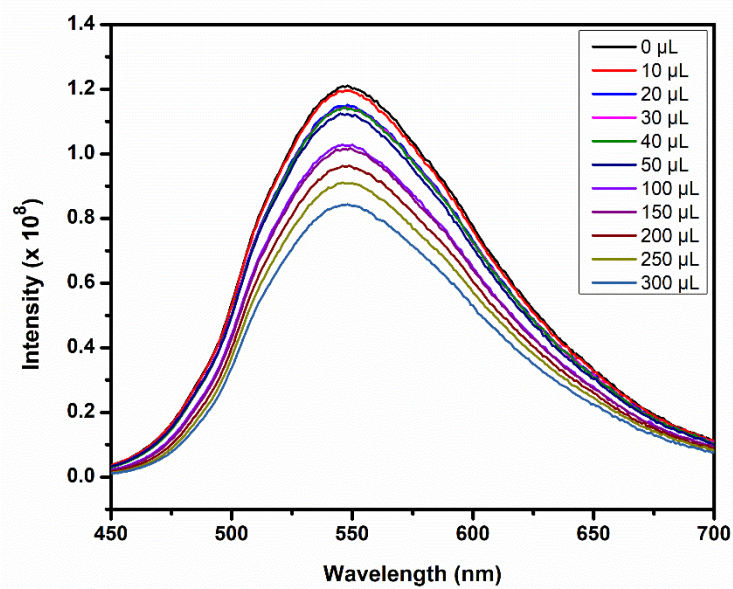

**Fig. S22** Emission spectra of **2** dispersed in aqueous solution upon incremental addition of 2-NA solution (1 mM).

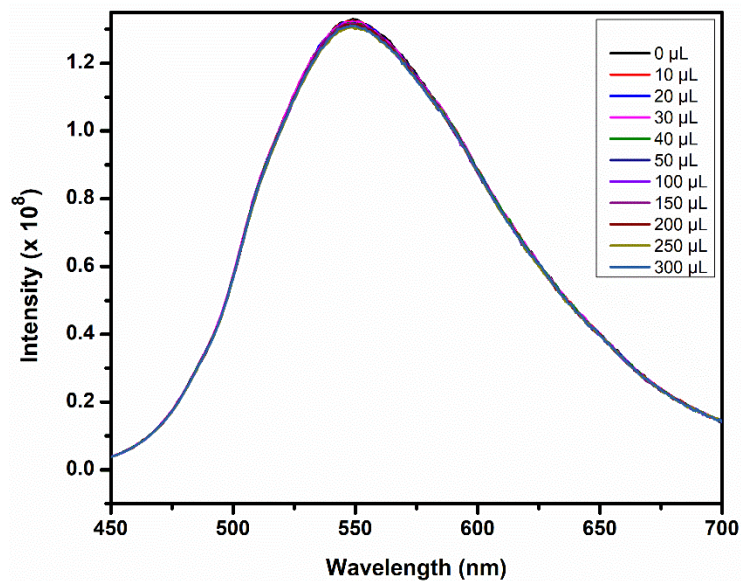

**Fig. S23** Emission spectra of **2** dispersed in aqueous solution upon incremental addition of Aniline solution (1 mM).

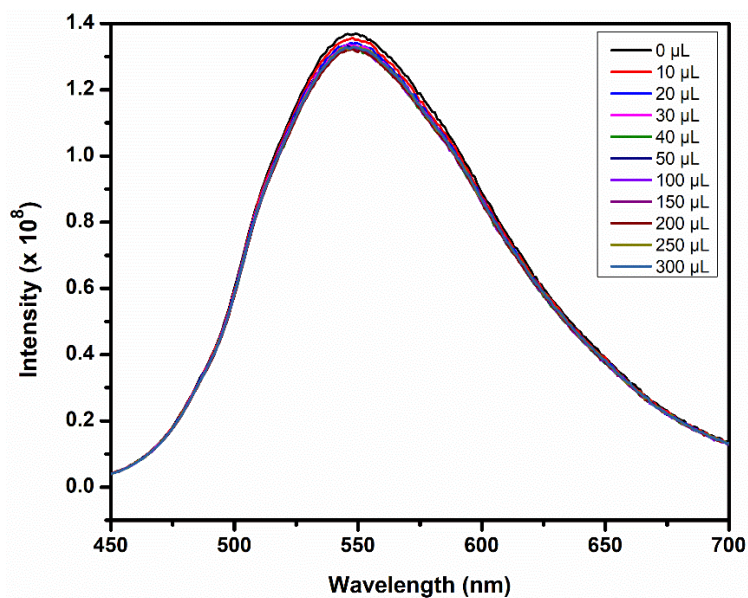

**Fig. S24** Emission spectra of **2** dispersed in aqueous solution upon incremental addition of EDA solution (1 mM).

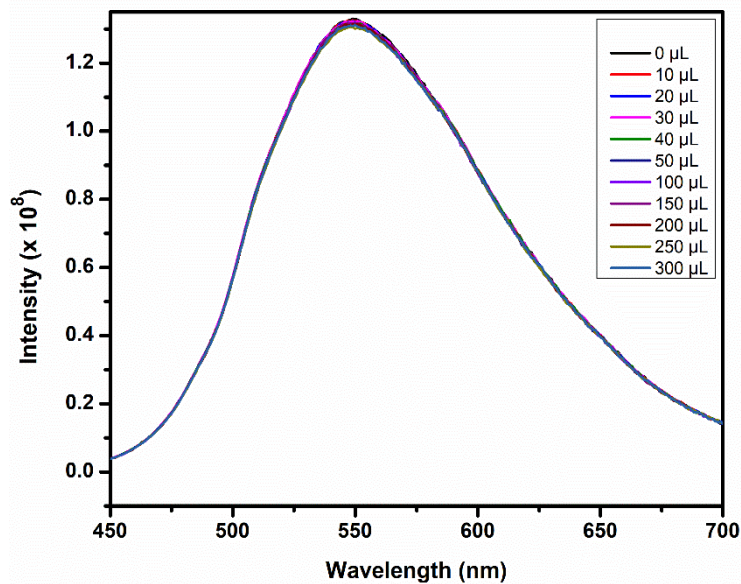

**Fig. S25** Emission spectra of **2** dispersed in aqueous solution upon incremental addition of TEA solution (1 mM).

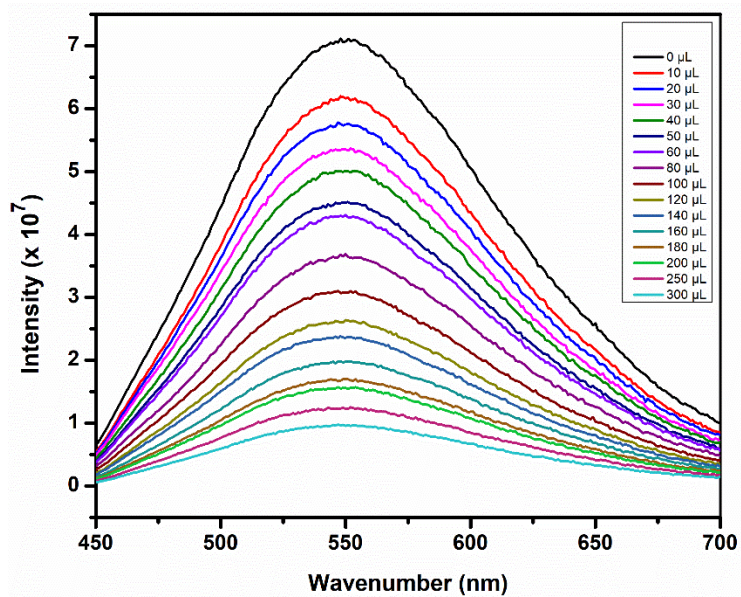

**Fig. S26** Emission spectra of **3** dispersed in aqueous solution upon incremental addition of 4-NA solution (1 mM).

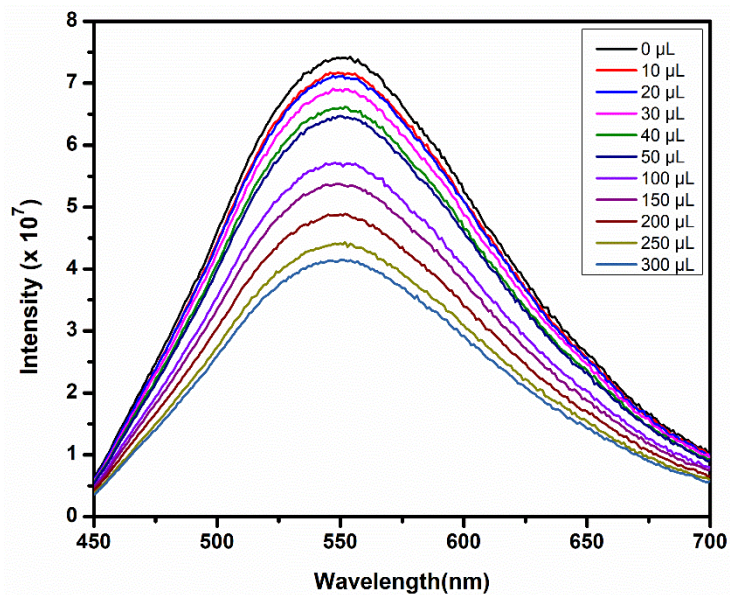

**Fig. S27** Emission spectra of **3** dispersed in aqueous solution upon incremental addition of 2,6-DCNA solution (1 mM).

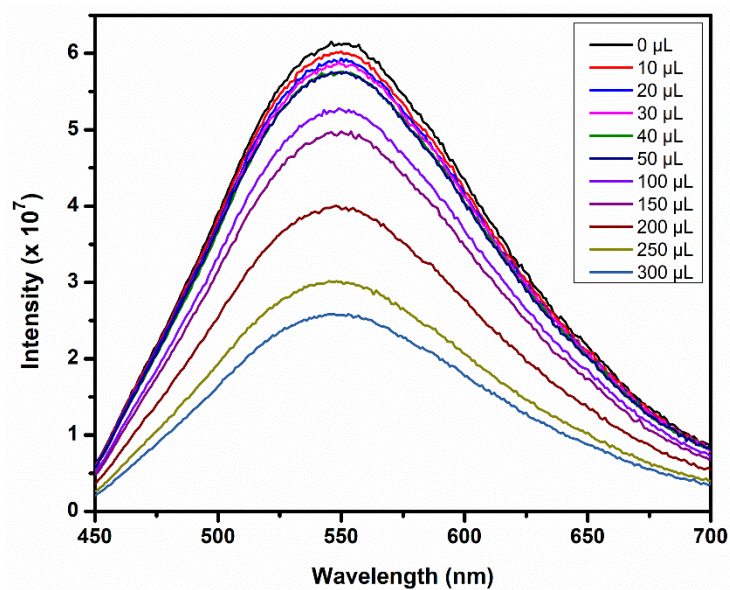

**Fig. S28** Emission spectra of **3** dispersed in aqueous solution upon incremental addition of 2,4-DNA solution (1 mM).



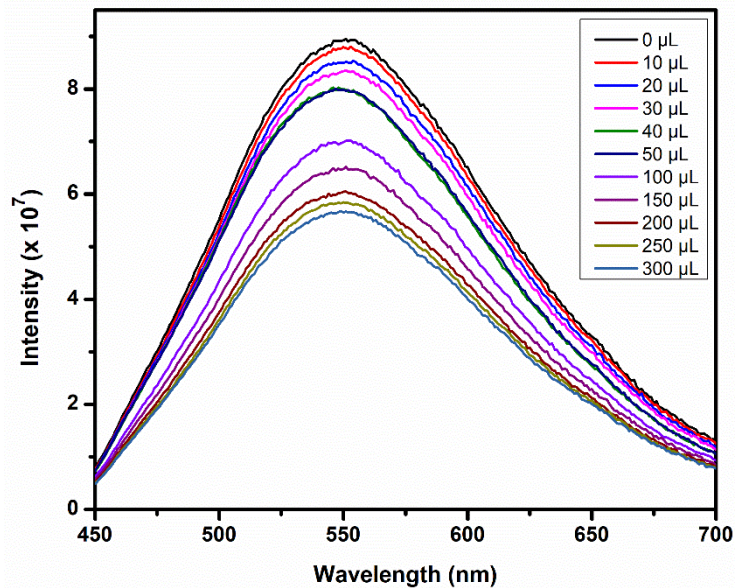

**Fig. S29** Emission spectra of **3** dispersed in aqueous solution upon incremental addition of 3-NA solution (1 mM).

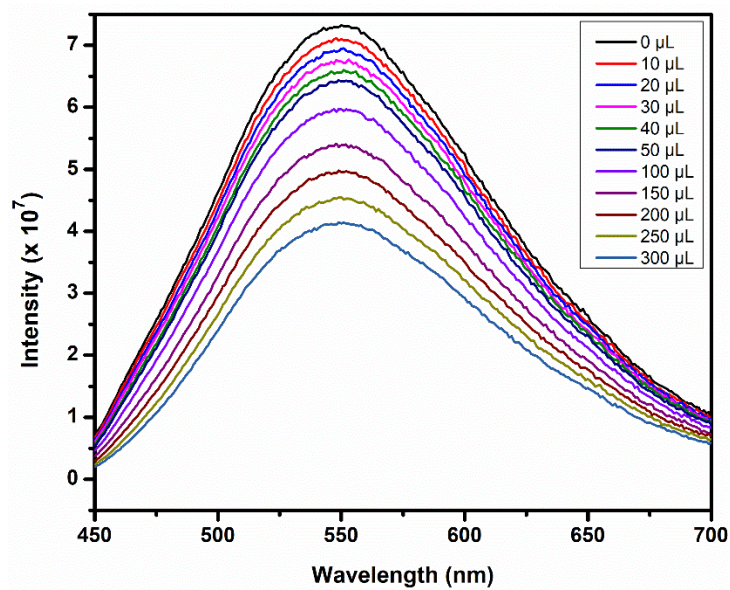

**Fig. S30** Emission spectra of **3** dispersed in aqueous solution upon incremental addition of 2-NA solution (1 mM).

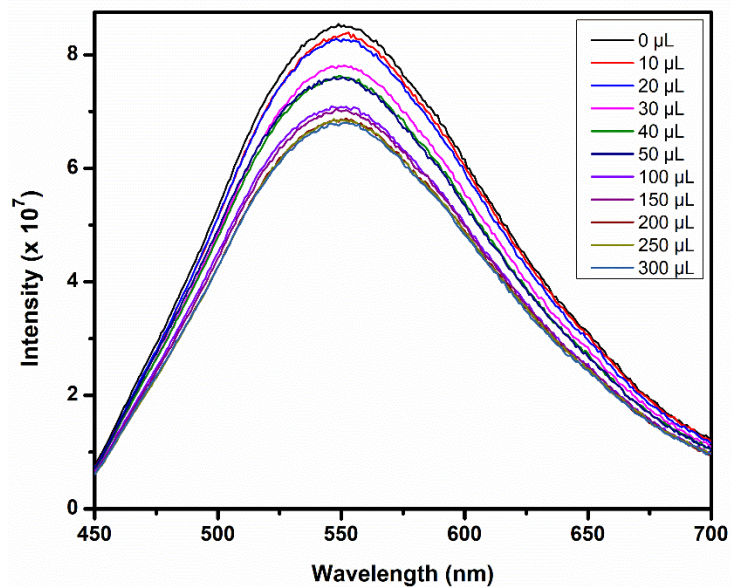

**Fig. S31** Emission spectra of **3** dispersed in aqueous solution upon incremental addition of Aniline solution (1 mM).

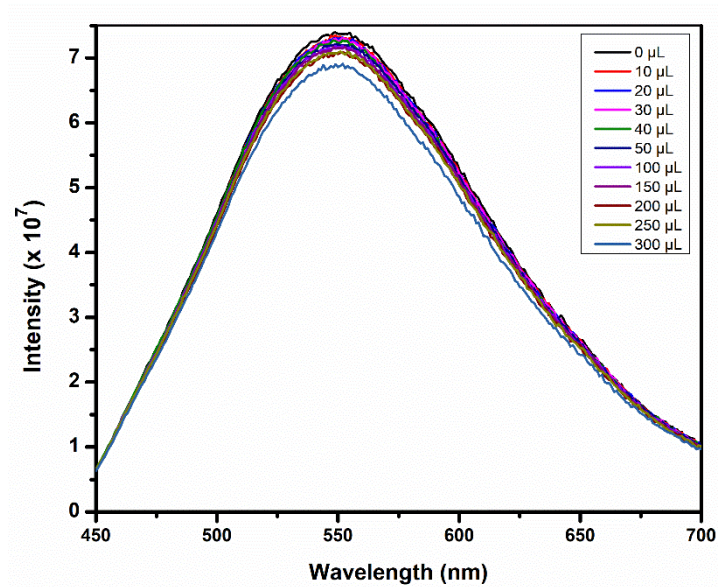

**Fig. S32** Emission spectra of **3** dispersed in aqueous solution upon incremental addition of EDA solution (1 mM).

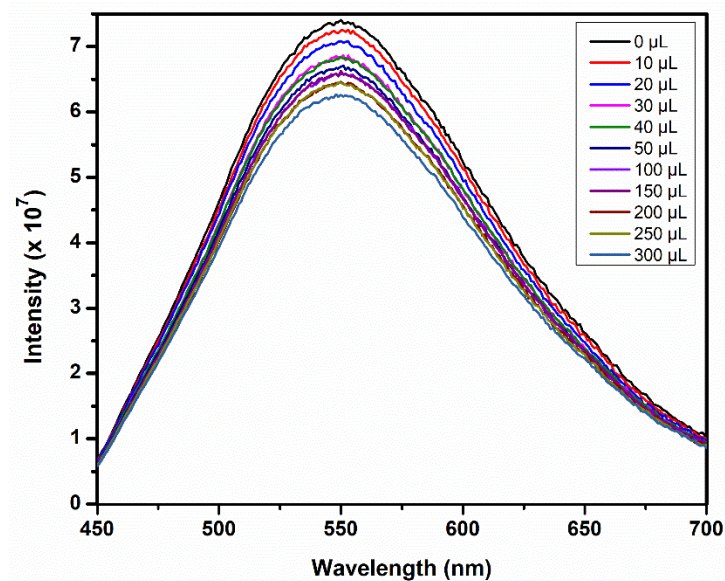

**Fig. S33** Emission spectra of **3** dispersed in aqueous solution upon incremental addition of TEA solution (1 mM).

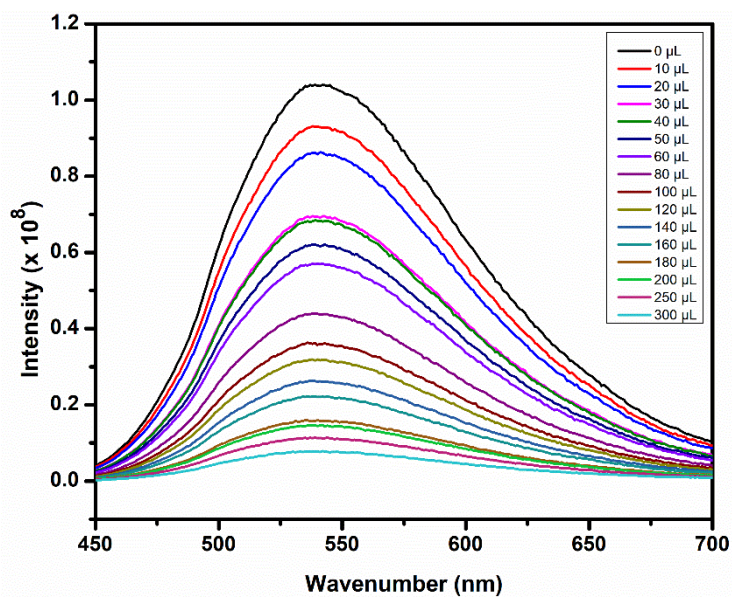

**Fig. S34** Emission spectra of **4** dispersed in aqueous solution upon incremental addition of 4-NA solution (1 mM).

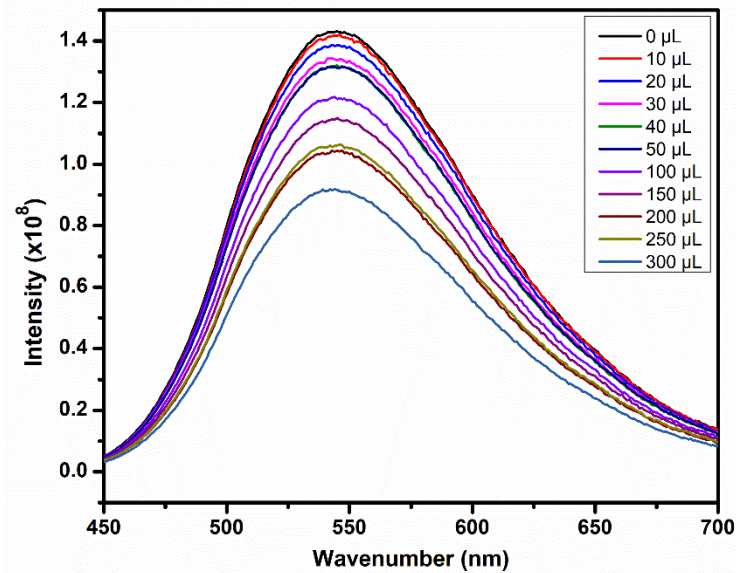

**Fig. S35** Emission spectra of **4** dispersed in aqueous solution upon incremental addition of 2,6-DCNA solution (1 mM).

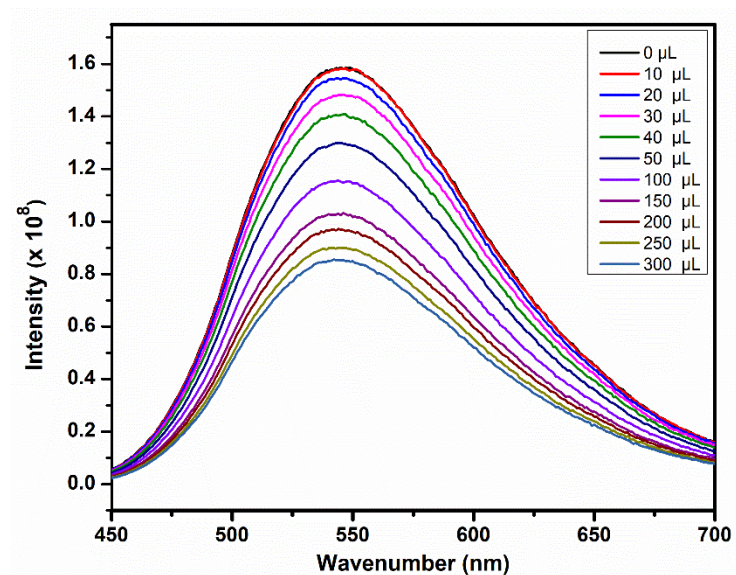

**Fig. S36** Emission spectra of **4** dispersed in aqueous solution upon incremental addition of 2,4-DNA solution (1 mM).

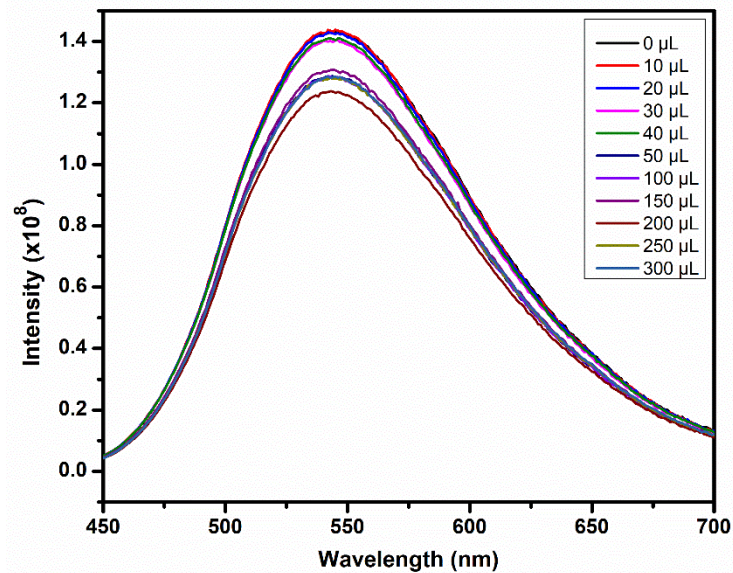

**Fig. S37** Emission spectra of **4** dispersed in aqueous solution upon incremental addition of 3-NA solution (1 mM).

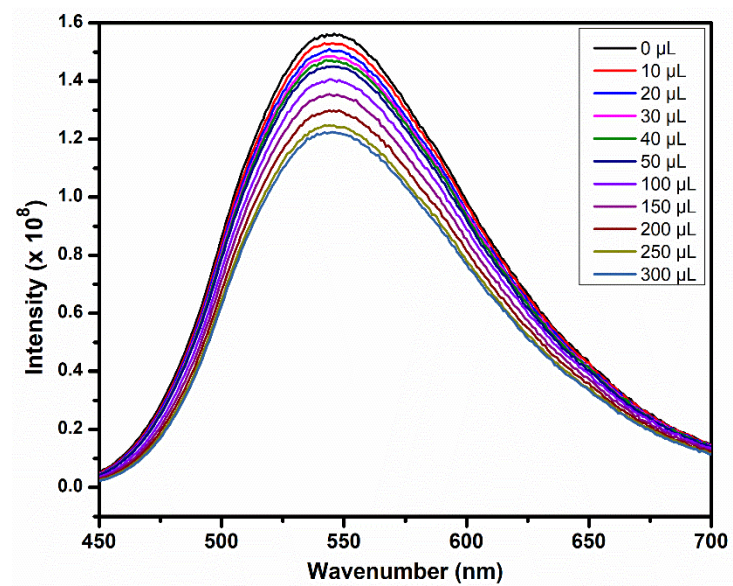

**Fig. S38** Emission spectra of **4** dispersed in aqueous solution upon incremental addition of 2-NA solution (1 mM).

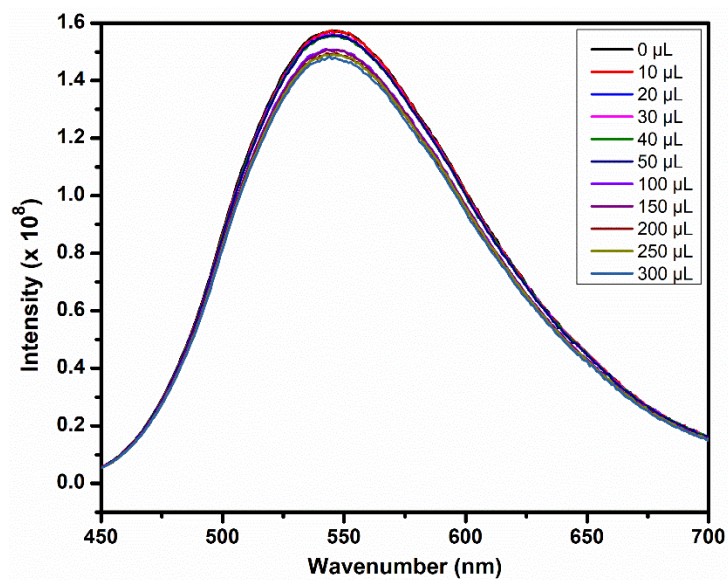

**Fig. S39** Emission spectra of **4** dispersed in aqueous solution upon incremental addition of Aniline solution (1 mM).

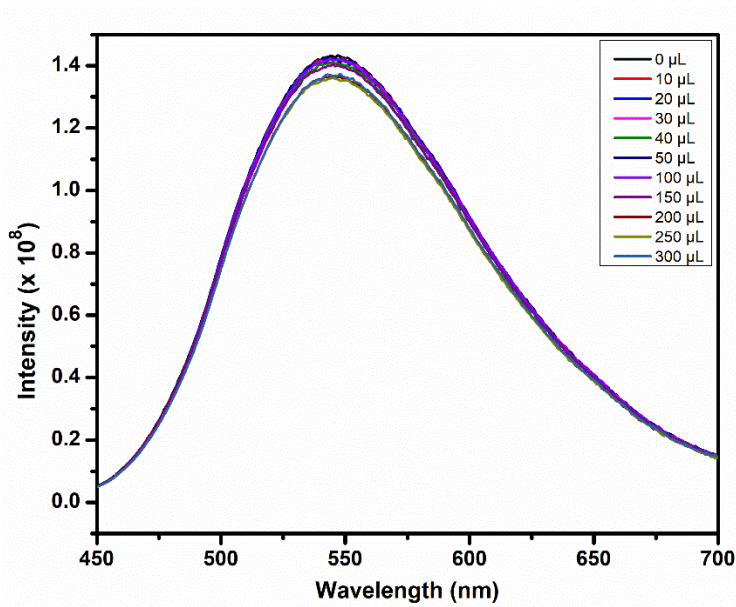

**Fig. S40** Emission spectra of **4** dispersed in aqueous solution upon incremental addition of EDA solution (1 mM).

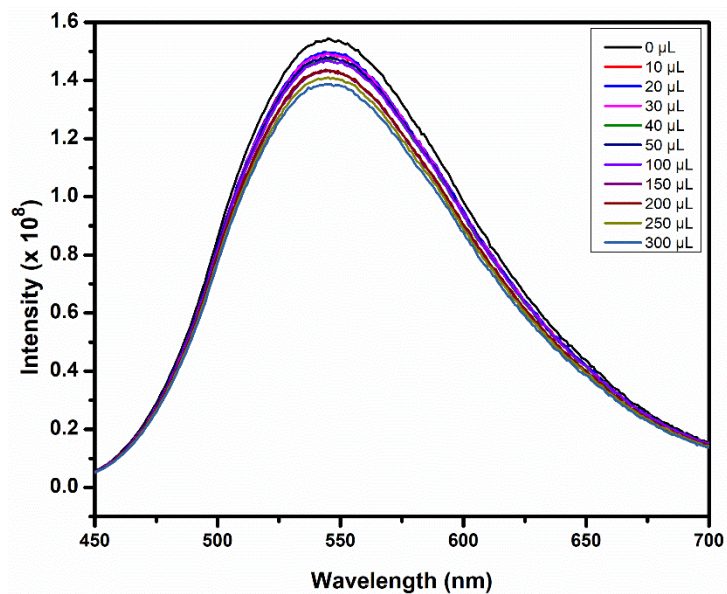

**Fig. S41** Emission spectra of **4** dispersed in aqueous solution upon incremental addition of TEA solution (1 mM).

#### Section S-4: Stern-Volmer plots of 4-NA in presence of 1-4

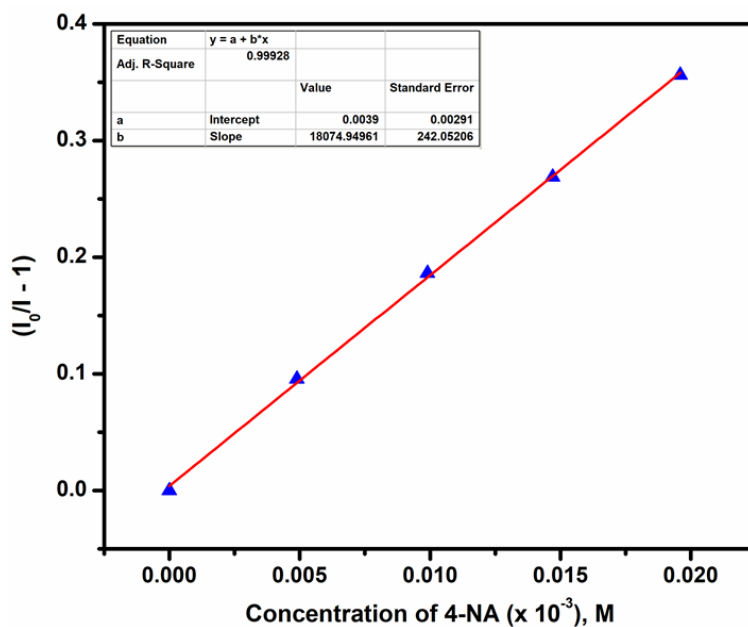

**Fig. S42** Stern-Volmer (SV) plot for 4-NA of **1**. The relative fluorescence intensity is linear with 4-NA concentration in the range of 0-20  $\mu\text{M}$ ,  $I_0/I = 1 + 18074.94961 ([4\text{-NA}])$  ( $R^2 = 0.999288$ ).

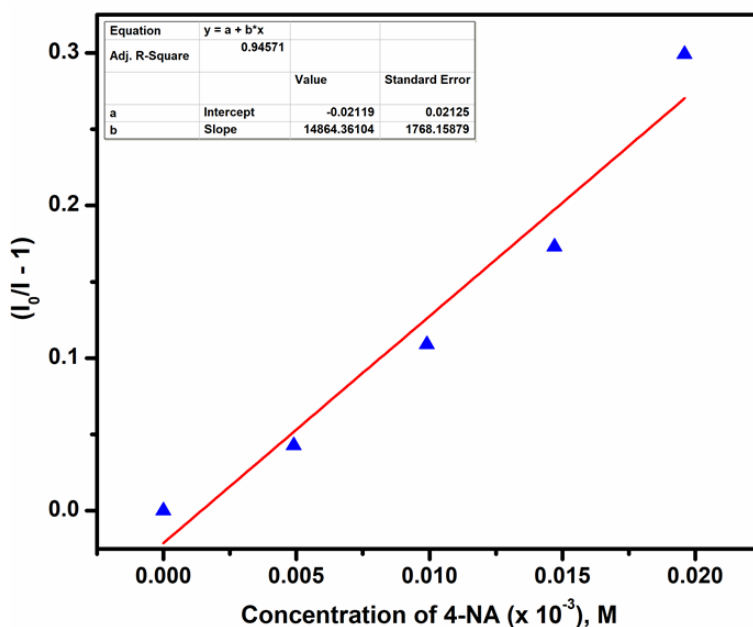

**Fig. S43** Stern-Volmer (SV) plot for 4-NA of **2**. The relative fluorescence intensity is linear with 4-NA concentration in the range of 0-20  $\mu\text{M}$ ,  $I_0/I = 1 + 14864.36104 ([4\text{-NA}])$  ( $R^2 = 0.94571$ ).



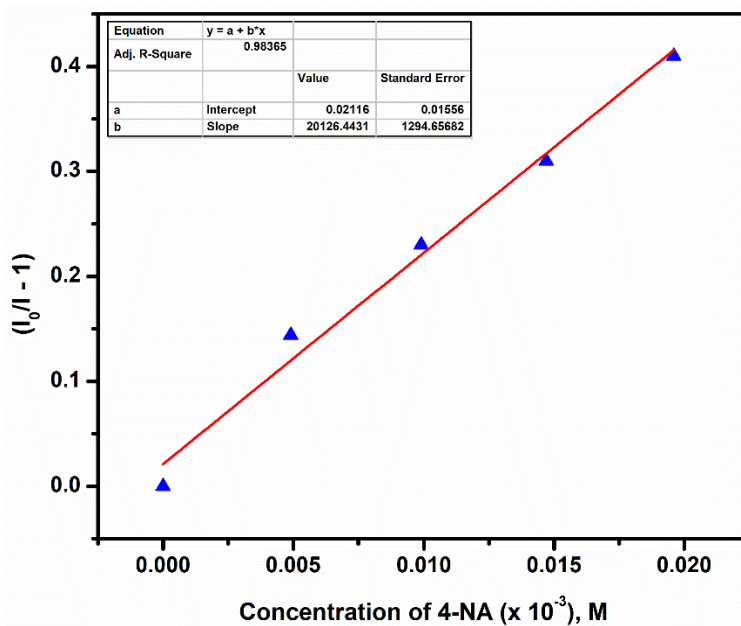

**Fig. S44** Stern-Volmer (SV) plot for 4-NA of **3**. The relative fluorescence intensity is linear with 4-NA concentration in the range of 0-20  $\mu\text{M}$ ,  $I_0/I = 1 + 20126.4431 ([4\text{-NA}])$  ( $R^2 = 0.98365$ ).

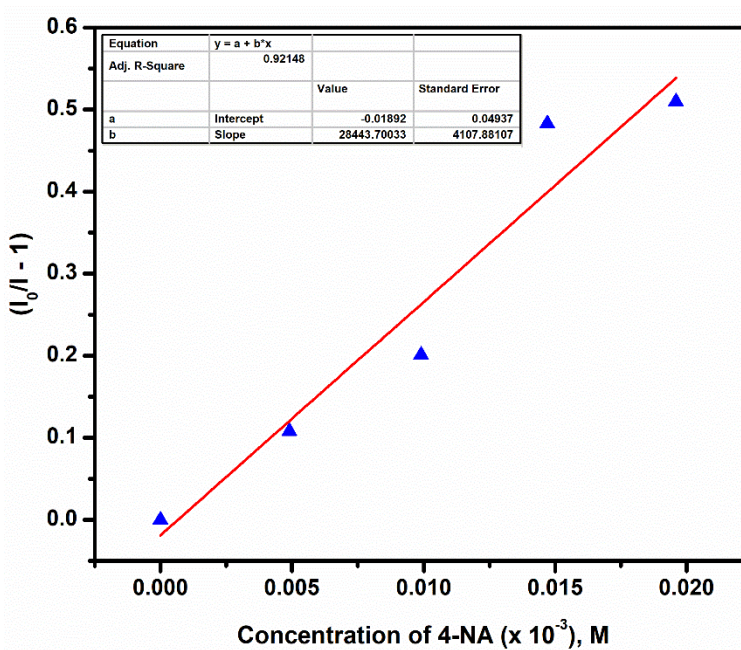

**Fig. S45** Stern-Volmer (SV) plot for 4-NA of **4**. The relative fluorescence intensity is linear with 4-NA concentration in the range of 0-20  $\mu\text{M}$ ,  $I_0/I = 1 + 28443.70033 ([4\text{-NA}])$  ( $R^2 = 0.92148$ ).

### Section S-5: Detection limit calculations for 1-4

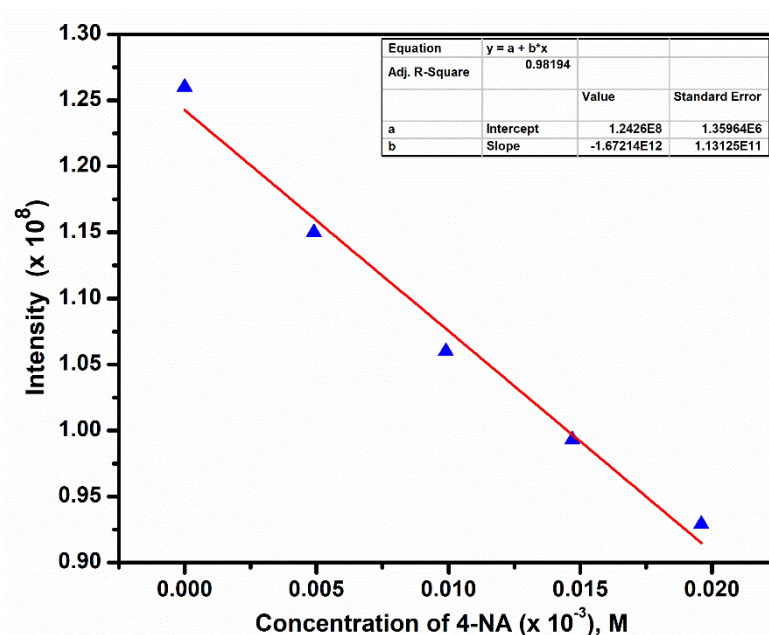

**Fig. S46** Linear region of fluorescence intensity of **1** upon incremental addition of 4-NA (1 mM stock solution) at  $\lambda_{em} = 548$  nm (upon  $\lambda_{ex} = 380$  nm) ( $R^2 = 0.98194$ ).

#### Calculation of Standard Deviation of 1:

| Blank Readings(5)               | Fl Intensity        |
|---------------------------------|---------------------|
| Reading 1                       | $1.281 \times 10^8$ |
| Reading 2                       | $1.292 \times 10^8$ |
| Reading 3                       | $1.284 \times 10^8$ |
| Reading 4                       | $1.281 \times 10^8$ |
| Reading 5                       | $1.291 \times 10^8$ |
| Standard Deviation ( $\sigma$ ) | $5.612 \times 10^5$ |

#### Determination of Detection Limit of 1:

Detection limit was calculated using the following equation:

$$\text{Detection limit} = 3\sigma/m$$

Where ' $\sigma$ ' is the calculated standard deviation from five blank measurements and ' $m$ ' is the slope obtained from the plot of fluorescence emission with increasing concentration of 4-NA.

|                                 |                                         |
|---------------------------------|-----------------------------------------|
| Slope from Graph                | $1.67214 \times 10^{12} \text{ M}^{-1}$ |
| Detection Limit ( $3\sigma/m$ ) | $1.006 \mu\text{M}$ ( <b>138 ppb</b> )  |

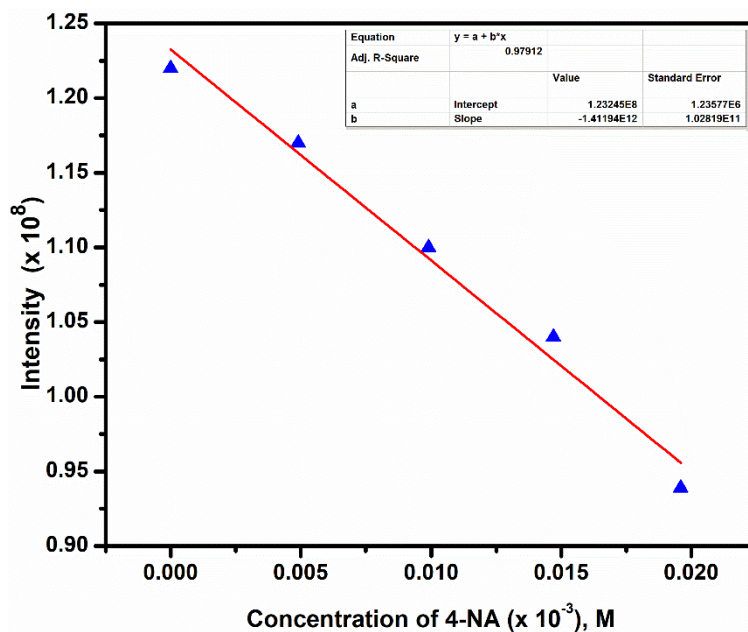

**Fig. S47** Linear region of fluorescence intensity of **2** upon incremental addition of 4-NA (1 mM stock solution) at  $\lambda_{em}$  = 548 nm (upon  $\lambda_{ex}$  = 380 nm) ( $R^2 = 0.97912$ ).

#### Calculation of Standard Deviation of **2**:

| Blank Readings(5)               | Fl Intensity            |
|---------------------------------|-------------------------|
| Reading 1                       | 1.138 x 10 <sup>8</sup> |
| Reading 2                       | 1.127 x 10 <sup>8</sup> |
| Reading 3                       | 1.15 x 10 <sup>8</sup>  |
| Reading 4                       | 1.156 x 10 <sup>8</sup> |
| Reading 5                       | 1.145 x 10 <sup>8</sup> |
| Standard Deviation ( $\sigma$ ) | 1.121 x 10 <sup>6</sup> |

#### Determination of Detection Limit of **2**:

Detection limit was calculated using the following equation:

$$\text{Detection limit} = 3\sigma/m$$

Where ' $\sigma$ ' is the calculated standard deviation from five blank measurements and ' $m$ ' is the slope obtained from the plot of fluorescence emission with increasing concentration of 4-NA.

|                                 |                                         |
|---------------------------------|-----------------------------------------|
| Slope from Graph                | 1.41 x 10 <sup>12</sup> M <sup>-1</sup> |
| Detection Limit (3 $\sigma$ /m) | 2.38 $\mu$ M ( <b>329 ppb</b> )         |

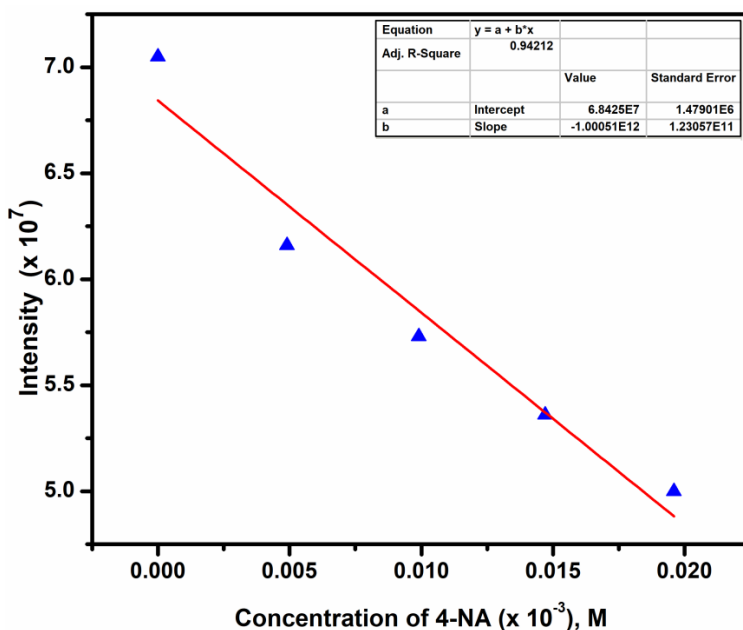

**Fig. S48** Linear region of fluorescence intensity of **3** upon incremental addition of 4-NA (1 mM stock solution) at  $\lambda_{em} = 551$  nm (upon  $\lambda_{ex} = 380$  nm) ( $R^2 = 0.94212$ ).

#### Calculation of Standard Deviation of **3**:

| Blank Readings(5)               | Fl Intensity       |
|---------------------------------|--------------------|
| Reading 1                       | $5.16 \times 10^7$ |
| Reading 2                       | $5.19 \times 10^7$ |
| Reading 3                       | $5.13 \times 10^7$ |
| Reading 4                       | $5.14 \times 10^7$ |
| Reading 5                       | $5.12 \times 10^7$ |
| Standard Deviation ( $\sigma$ ) | $2.77 \times 10^5$ |

#### Determination of Detection Limit of **3**:

Detection limit was calculated using the following equation:

$$\text{Detection limit} = 3\sigma/m$$

Where ' $\sigma$ ' is the calculated standard deviation from five blank measurements and ' $m$ ' is the slope obtained from the plot of fluorescence emission with increasing concentration of 4-NA.

|                                 |                                        |
|---------------------------------|----------------------------------------|
| Slope from Graph                | $1.0005 \times 10^{12} \text{ M}^{-1}$ |
| Detection Limit ( $3\sigma/m$ ) | $0.830 \mu\text{M}$ ( <b>114 ppb</b> ) |

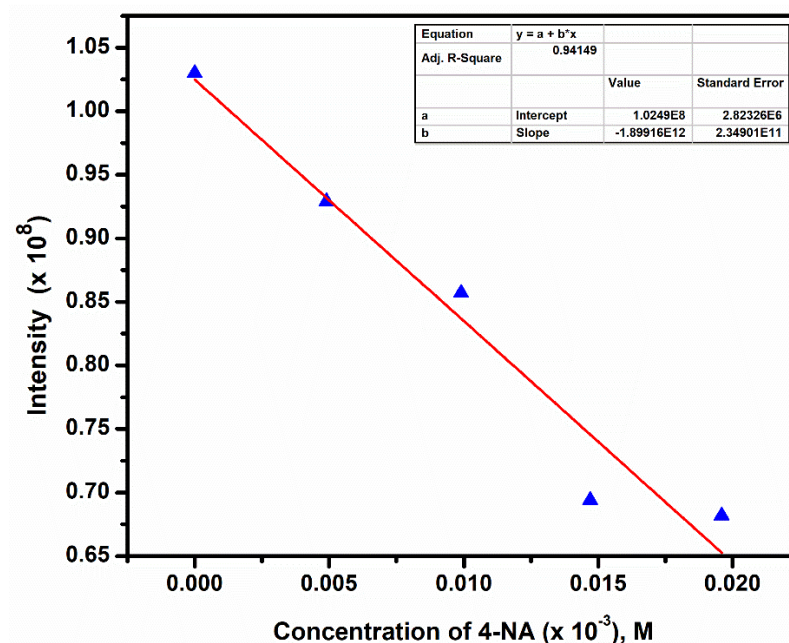

**Fig. S49** Linear region of fluorescence intensity of **4** upon incremental addition of 4-NA (1 mM stock solution) at  $\lambda_{em} = 547$  nm (upon  $\lambda_{ex} = 380$  nm) ( $R^2 = 0.94149$ ).

#### Calculation of Standard Deviation of **4**:

| Blank Readings(5)               | Fl Intensity       |
|---------------------------------|--------------------|
| Reading 1                       | $1.35 \times 10^8$ |
| Reading 2                       | $1.36 \times 10^8$ |
| Reading 3                       | $1.34 \times 10^8$ |
| Reading 4                       | $1.36 \times 10^8$ |
| Reading 5                       | $1.36 \times 10^8$ |
| Standard Deviation ( $\sigma$ ) | $4.47 \times 10^5$ |

#### Determination of Detection Limit of **4**:

Detection limit was calculated using the following equation:

$$\text{Detection limit} = 3\sigma/m$$

Where ' $\sigma$ ' is the calculated standard deviation from five blank measurements and ' $m$ ' is the slope obtained from the plot of fluorescence emission with increasing concentration of 4-NA.

|                                 |                                         |
|---------------------------------|-----------------------------------------|
| Slope from Graph                | $1.89916 \times 10^{12} \text{ M}^{-1}$ |
| Detection Limit ( $3\sigma/m$ ) | $0.706 \mu\text{M}$ ( <b>97 ppb</b> )   |

Section S-6: Photoluminescence study of H<sub>2</sub>(mbhna)

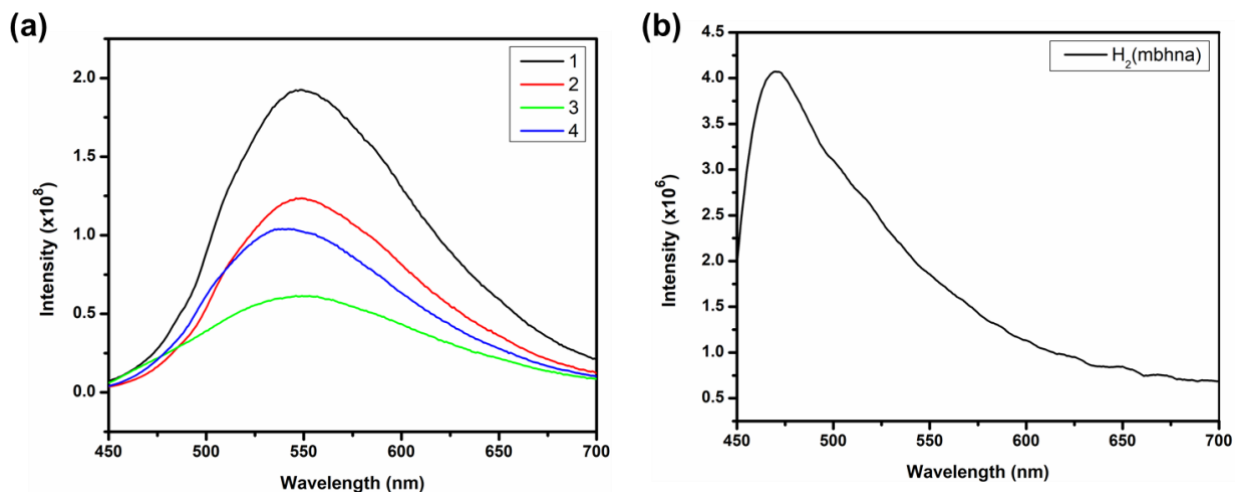

**Fig. S50** (a) Emission spectra of 1-4; (b) Emission spectrum of H<sub>2</sub>(mbhna) dispersed in aqueous solution ( $\lambda_{\text{ex}} = 380$  nm).

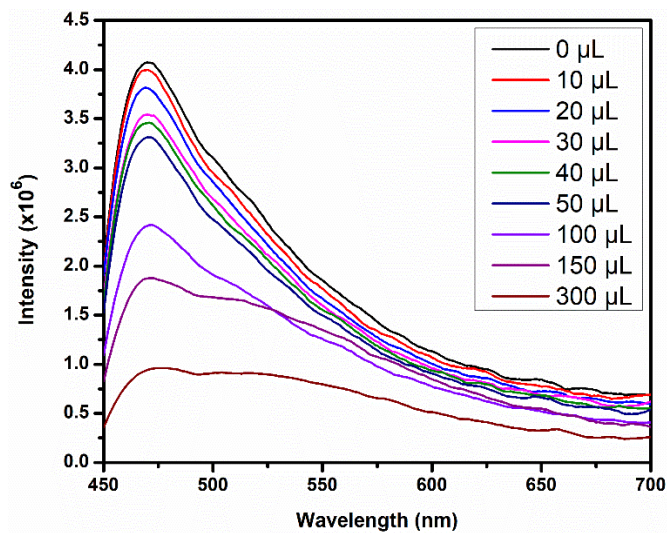

**Fig. S51** Emission spectra of H<sub>2</sub>(mbhna) dispersed in aqueous solution upon incremental addition of 4-NA solution (1 mM) ( $\lambda_{\text{em}} = 470$  nm and  $\lambda_{\text{ex}} = 380$  nm).

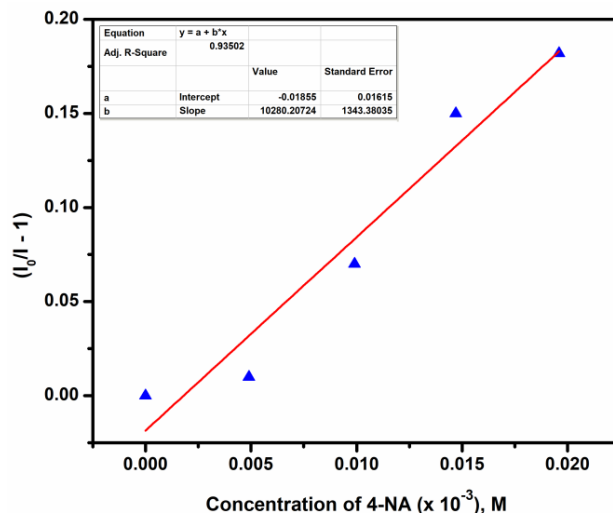

**Fig. S52** Stern-Volmer (SV) plot for 4-NA of H<sub>2</sub>(mbhna). The relative fluorescence intensity is linear with 4-NA concentration in the range of 0-20  $\mu$ M,  $I_0/I = 1 + 10280.20724 ([4\text{-NA}])$  ( $R^2 = 0.93502$ ).

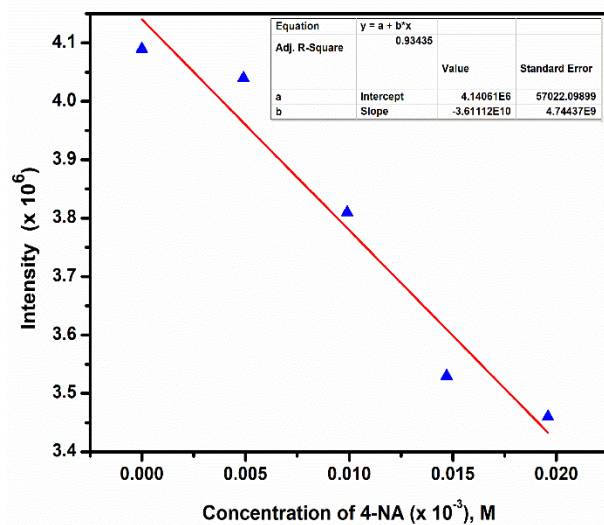

**Fig. S53** Linear region of fluorescence intensity of H<sub>2</sub>(mbhna) upon incremental addition of 4-NA (1 mM stock solution) at  $\lambda_{em} = 470$  nm (upon  $\lambda_{ex} = 380$  nm) ( $R^2 = 0.93435$ ).

### Calculation of Standard Deviation of H<sub>2</sub>(mbhna):

| Blank Readings(5)               | Fl Intensity              |
|---------------------------------|---------------------------|
| Reading 1                       | 4.09 x 10 <sup>6</sup>    |
| Reading 2                       | 3.96 x 10 <sup>6</sup>    |
| Reading 3                       | 3.68 x 10 <sup>6</sup>    |
| Reading 4                       | 3.34 x 10 <sup>6</sup>    |
| Reading 5                       | 3.24 x 10 <sup>6</sup>    |
| Standard Deviation ( $\sigma$ ) | 3.72182 x 10 <sup>5</sup> |

### Determination of Detection Limit of H<sub>2</sub>(mbhna):

Detection limit was calculated using the following equation:

$$\text{Detection limit} = 3\sigma/m$$

Where ' $\sigma$ ' is the calculated standard deviation from five blank measurements and ' $m$ ' is the slope obtained from the plot of fluorescence emission with increasing concentration of 4-NA.

|                                 |                                          |
|---------------------------------|------------------------------------------|
| Slope from Graph                | 3.611 x 10 <sup>10</sup> M <sup>-1</sup> |
| Detection Limit (3 $\sigma$ /m) | 30.9 $\mu$ M ( <b>4.2 ppm</b> )          |



Section S-7: Spectral overlap and possible interaction sites in 1-4

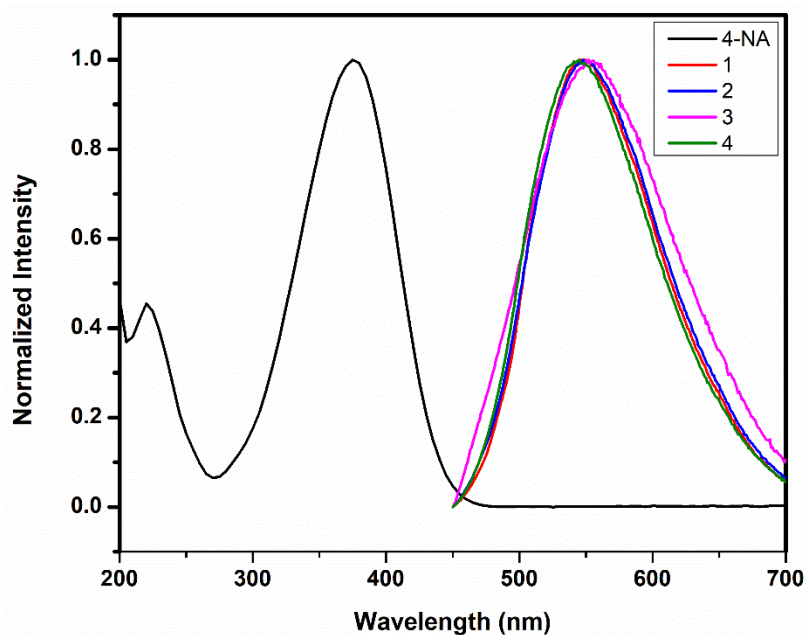

Fig. S54 Spectral overlap of absorption spectrum of 4-NA and emission spectra of 1-4.

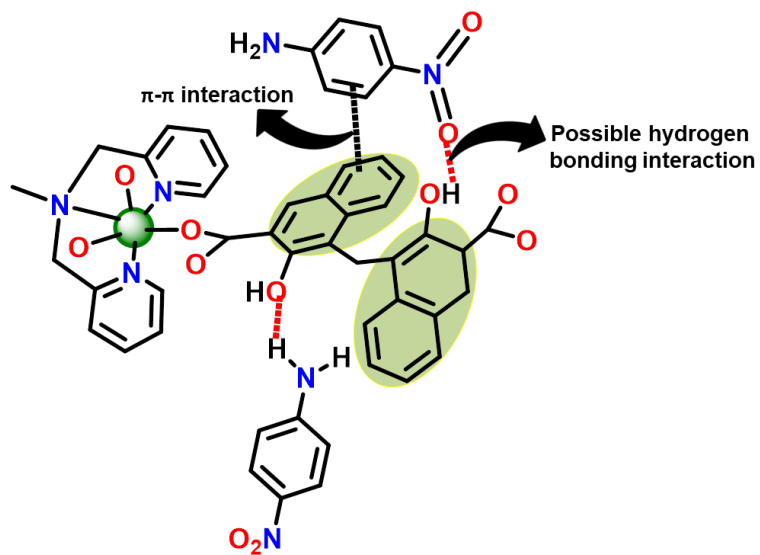

Fig. S55 Possible interaction sites in 1-4 with 4-NA.

Section S-8: Stability of 1-4 in 4-NA

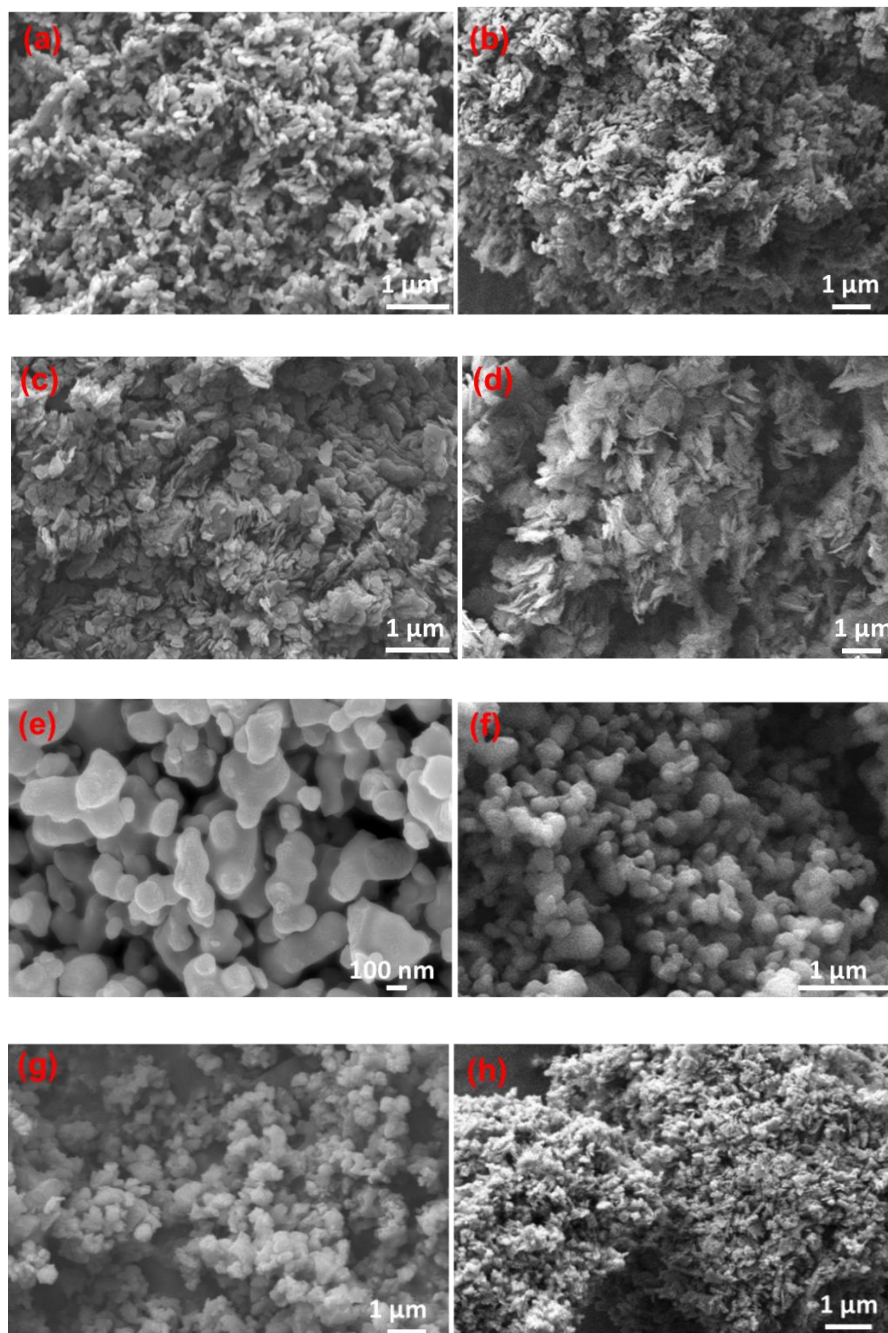

**Fig. S56** FESEM images of 1-4 before (a,c,e,g) and after (b,d,f,h) immersing in 4-NA.

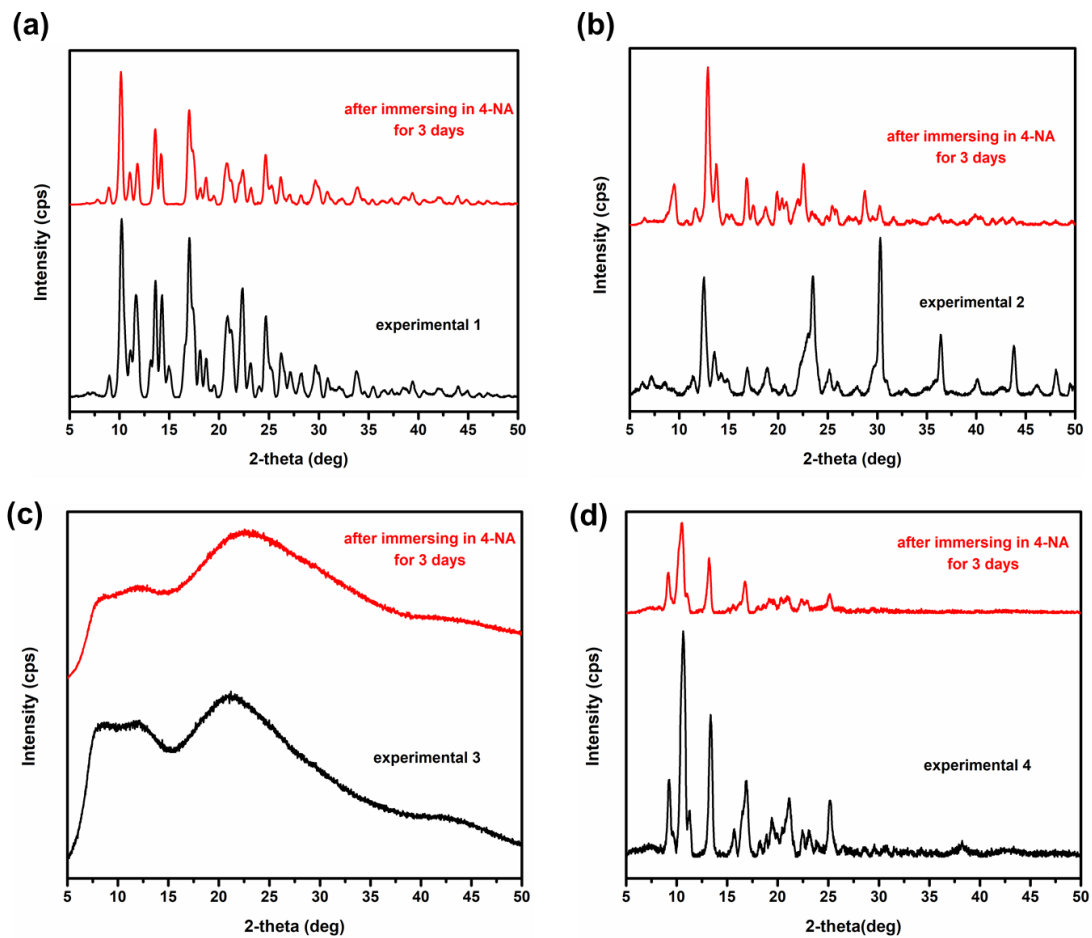

**Fig. S57** PXR D patterns of **1-4** before and after immersing in 4-NA for 3 days.

**Table S1** Literature survey on 4-NA detection

| Compound                                                                                                                                                                                       | K <sub>sv</sub> (M <sup>-1</sup> ) | Detection Limit                     | Solvent        | Reference                                                            |
|------------------------------------------------------------------------------------------------------------------------------------------------------------------------------------------------|------------------------------------|-------------------------------------|----------------|----------------------------------------------------------------------|
| {[Zn(mbhna)(bpea)] <sub>n</sub> (1)}                                                                                                                                                           | 1.80 x 10 <sup>4</sup>             | 130 ppb                             | Water          | <i>This work</i>                                                     |
| {[Cd(mbhna)(bpea)] <sub>n</sub> (2)}                                                                                                                                                           | 1.48 x 10 <sup>4</sup>             | 330 ppb                             | Water          | <i>This work</i>                                                     |
| {[Zn(mbhna)(bpba)]·CH <sub>3</sub> OH·H <sub>2</sub> O} <sub>n</sub> (3)}                                                                                                                      | 2.01 x 10 <sup>4</sup>             | 114 ppb                             | Water          | <i>This work</i>                                                     |
| {[Cd(mbhna)(bpba)] <sub>n</sub> (4)}                                                                                                                                                           | 2.84 x 10 <sup>4</sup>             | 97 ppb                              | Water          | <i>This work</i>                                                     |
| {Zn <sub>4</sub> (TPOM)(1,4-NDC) <sub>4</sub> } <sub>n</sub>                                                                                                                                   | 7.87 x 10 <sup>4</sup>             | 88 ppb                              | Water          | <i>ACS Appl. Mater. Interfaces</i> , 2018, <b>10</b> , 42406–42416.  |
| [Zn <sub>2</sub> (tpbn)(mbhna) <sub>2</sub> ]·3.5H <sub>2</sub> O·1.5DMF                                                                                                                       | 2.23 x 10 <sup>4</sup>             | 0.74 ppm                            | Water          | <i>Chem. Asian J.</i> , 2019, <b>14</b> , 3712–3720.                 |
| {[Cd <sub>2</sub> (tpbn)(mbhna) <sub>2</sub> ]·2DMF} <sub>n</sub>                                                                                                                              | 2.87 x 10 <sup>4</sup>             | 0.46 ppm                            | Water          |                                                                      |
| [Cd(H <sub>2</sub> BDDA)] <sub>n</sub><br>where, H <sub>4</sub> BDDA = 4,4'-([2, 2'-bipyridine]-6,6'-diylbis(oxy) diphthalic acid                                                              | 8.79 x 10 <sup>4</sup>             | 0.68 ppm                            | Water          | <i>ChemistrySelect</i> , 2017, <b>2</b> , 12046–12050.               |
| {Zn(bpba)(NO <sub>3</sub> ) <sub>n</sub><br>Hbpba = 4-(bis(4-(pyridin-4-yl)phenyl)amino)benzoic acid}                                                                                          | 2.28 x 10 <sup>4</sup>             | 0.1 ppm                             | DMF            | <i>Dalton Trans.</i> , 2018, <b>47</b> , 7222–7228.                  |
| [Zn(mbhna)(bpma)] <sub>n</sub>                                                                                                                                                                 | 7.01 x 10 <sup>3</sup>             | 7.15 ppm                            | Water          | <i>Eur. J. Inorg. Chem.</i> , <b>2021</b> , 2595–2605.               |
| {[Cd(mbhna)(bpma)]·DMF} <sub>n</sub>                                                                                                                                                           | 2.20 x 10 <sup>4</sup>             | 1.33 ppm                            | Water          |                                                                      |
| [Zn(mbhna)(bpta)] <sub>n</sub>                                                                                                                                                                 | 2.11 x 10 <sup>4</sup>             | 1.94 ppm                            | Water          |                                                                      |
| {[Cd(mbhna)(bpta)(CH <sub>3</sub> OH)] <sub>n</sub>                                                                                                                                            | 1.57 x 10 <sup>4</sup>             | 4.50 ppm                            | Water          |                                                                      |
| {Cd(5-asba)(bimb)} <sub>n</sub><br>where, H <sub>2</sub> 5-asba = 2-amino-5-sulfobenzoic acid and<br>bimb = 1,4-bis(1H-imidazol-1-yl)butane                                                    | 9.8 x 10 <sup>4</sup>              | 0.52 ppm                            | Water/<br>MeOH | <i>J. Mater. Chem. C</i> , 2016, <b>4</b> , 11404–11418.             |
| TPDC-DB                                                                                                                                                                                        | 1.7 x 10 <sup>4</sup>              | 0.45 ppm                            | THF            | <i>J. Mater. Chem. C</i> , 2016, <b>4</b> , 4427–4433.               |
| {[Zn <sub>4</sub> (μ <sub>3</sub> -OH) <sub>2</sub> (L)(H <sub>2</sub> O) <sub>2</sub> ]·2DMF} <sub>n</sub><br>where L = [1,1'; 4',1'']terphenyl-3,5,2',5',3'',5''-hexacarboxylic acid         | NA                                 | 4 ppm                               | DMF            | <i>J. Mater. Chem. A</i> , 2015, <b>3</b> , 22369–22376.             |
| {Zn <sub>3</sub> L <sub>3</sub> (DMF) <sub>2</sub> } <sub>n</sub>                                                                                                                              | 5.99 x 10 <sup>4</sup>             | NA                                  | Acetonitrile   | <i>Journal of Solid State Chemistry</i> , 2015, <b>232</b> , 96–101. |
| {Zn <sub>3</sub> L <sub>3</sub> (DMA) <sub>2</sub> (H <sub>2</sub> O) <sub>3</sub> } <sub>n</sub><br>where, L = 4,4'-stillbene dicarboxylic acid                                               | 2.18 x 10 <sup>4</sup>             | NA                                  |                |                                                                      |
| {[Eu <sub>2</sub> (TDC) <sub>3</sub> (CH <sub>3</sub> OH) <sub>2</sub> ]·CH <sub>3</sub> OH} <sub>n</sub>                                                                                      | 4.32 x 10 <sup>4</sup>             | NA                                  | MeOH           | <i>RSC Adv.</i> , 2016, <b>6</b> , 91741–91747.                      |
| {[Tb <sub>2</sub> (TDC) <sub>3</sub> (CH <sub>3</sub> OH) <sub>2</sub> ]·CH <sub>3</sub> OH} <sub>n</sub><br>where, TDC = 2,5-thiophene dicarboxylic acid                                      | 9.52 x 10 <sup>3</sup>             | NA                                  |                |                                                                      |
| {[Zn <sub>2</sub> (oba) <sub>2</sub> (4-bpdb)]·2DMF} <sub>n</sub><br>(TMU-4)<br>where, H <sub>2</sub> oba = 4,4'-oxybisbenzoic acid and<br>4-bpdb = 1,4-bis(4-pyridyl)-2,3-diaza-1,3-butadiene | 2.95 x 10 <sup>4</sup>             | 5 x 10 <sup>-5</sup> M<br>(6.9 ppm) | Acetonitrile   | <i>Sensors and Actuators B</i> , 2017, <b>243</b> , 353–360.         |
| H <sub>2</sub> Tyr-N-Dan                                                                                                                                                                       | NA                                 | NA                                  | MeOH           | <i>RSC Adv.</i> , 2014, <b>4</b> , 47249–47253.                      |
| Cd-PDA<br>where, H <sub>2</sub> PDA = 9-phenylcarbazole-3,6-dicarboxylic acid                                                                                                                  | 4.07 x 10 <sup>4</sup>             | 3.5 ppb                             | Water          | <i>J. Mater. Chem. A</i> , 2016, <b>4</b> , 16349–16355.             |
